# Supplementary material for: Deubiquitylase OTUD6B Governs pVHL Stability in an Enzyme‐Independent Manner and Suppresses Hepatocellular Carcinoma Metastasis
Source: PubMed Central journal article supplement (PMC7175249; doi:10.1002/advs.201902040), 2020-03-08
Supplement: ADVS-7-1902040-s001.pdf [file ADVS-7-1902040-s001.pdf]

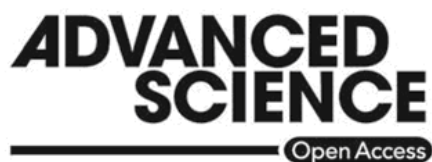

## Supporting Information

for *Adv. Sci.*, DOI: 10.1002/adv.201902040

Deubiquitylase OTUD6B Governs pVHL Stability  
in an Enzyme-Independent Manner and Suppresses  
Hepatocellular Carcinoma Metastasis

*Xinxin Liu, Xiaoli Zhang, Zhiqiang Peng, Chunnan Li, Ze  
Wang, Chanjuan Wang, Zhikang Deng, Bo Wu, Yu Cui,  
Zhanxin Wang, Chun-Ping Cui,\* Min Zheng,\* and Lingqiang  
Zhang\**

## Supporting Information

### **Deubiquitylase OTUD6B governs pVHL stability in an enzyme-independent manner and suppresses hepatocellular carcinoma metastasis**

*Xinxin Liu<sup>#</sup>, Xiaoli Zhang<sup>#</sup>, Zhiqiang Peng<sup>#</sup>, Chunnan Li, Ze Wang, Chanjuan Wang, Zhikang Deng, Zhanxin Wang, Bo Wu, Yu Cui, Chun-Ping Cui<sup>\*</sup>, Min Zheng<sup>\*</sup>, Lingqiang Zhang<sup>\*</sup>*

*<sup>#</sup>These authors contributed equally to this work.*

*\*Correspondence should be addressed to L.Z. (e-mail: zhanglq@nic.bmi.ac.cn), M.Z. (e-mail: minzheng@zju.edu.cn) and C.P.C. (e-mail: cui\_chunping2000@aliyun.com)*

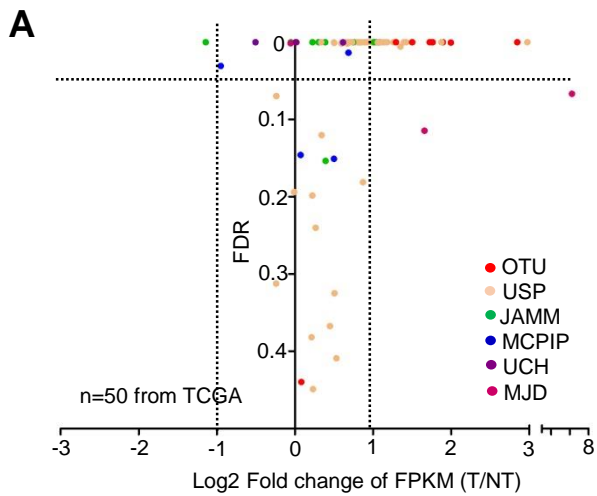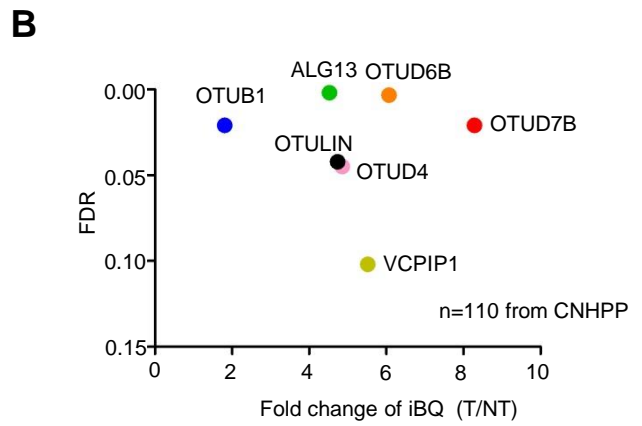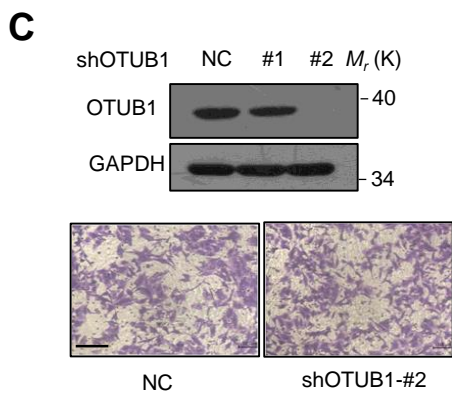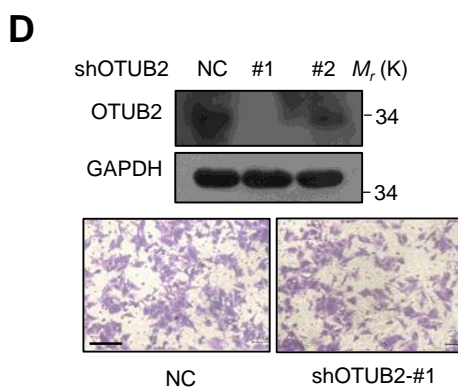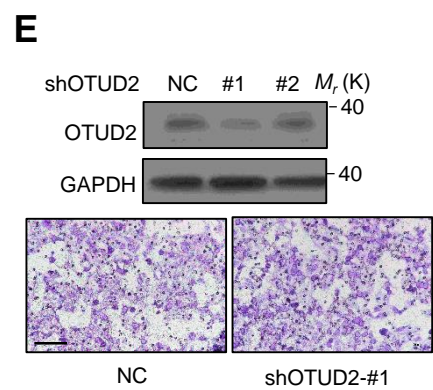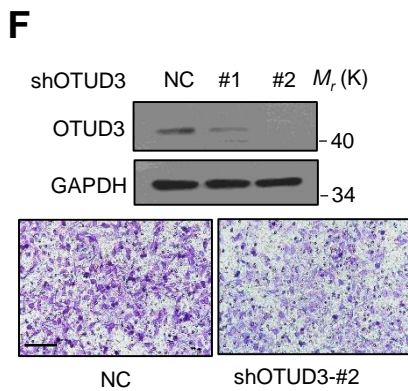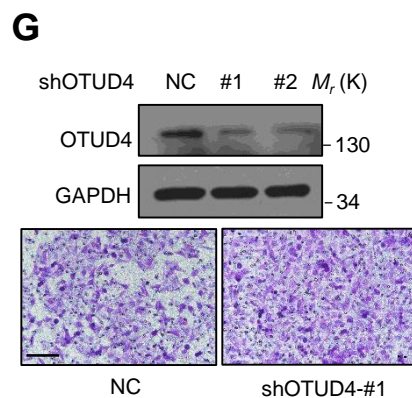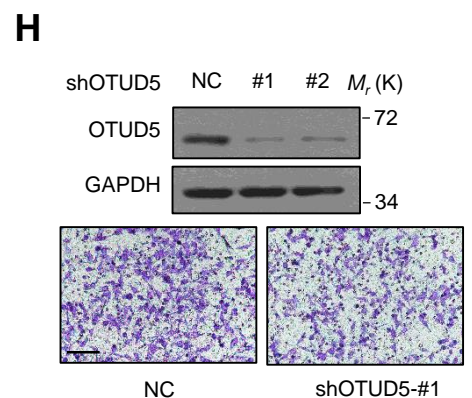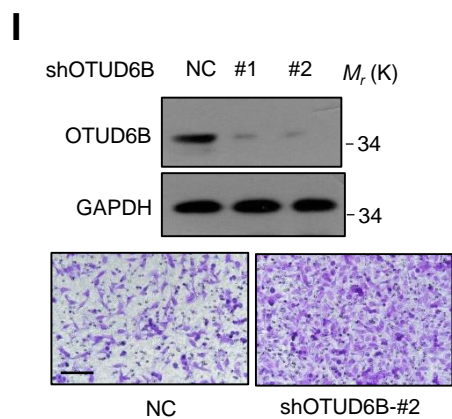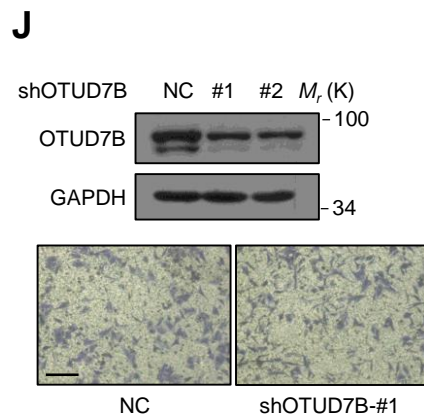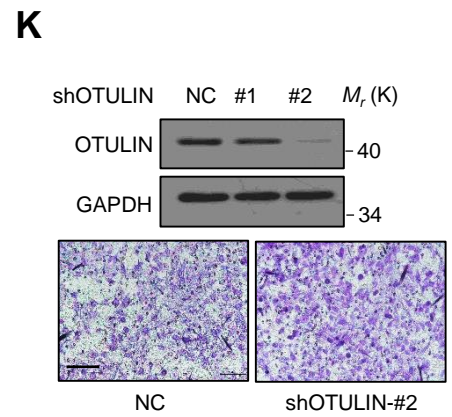

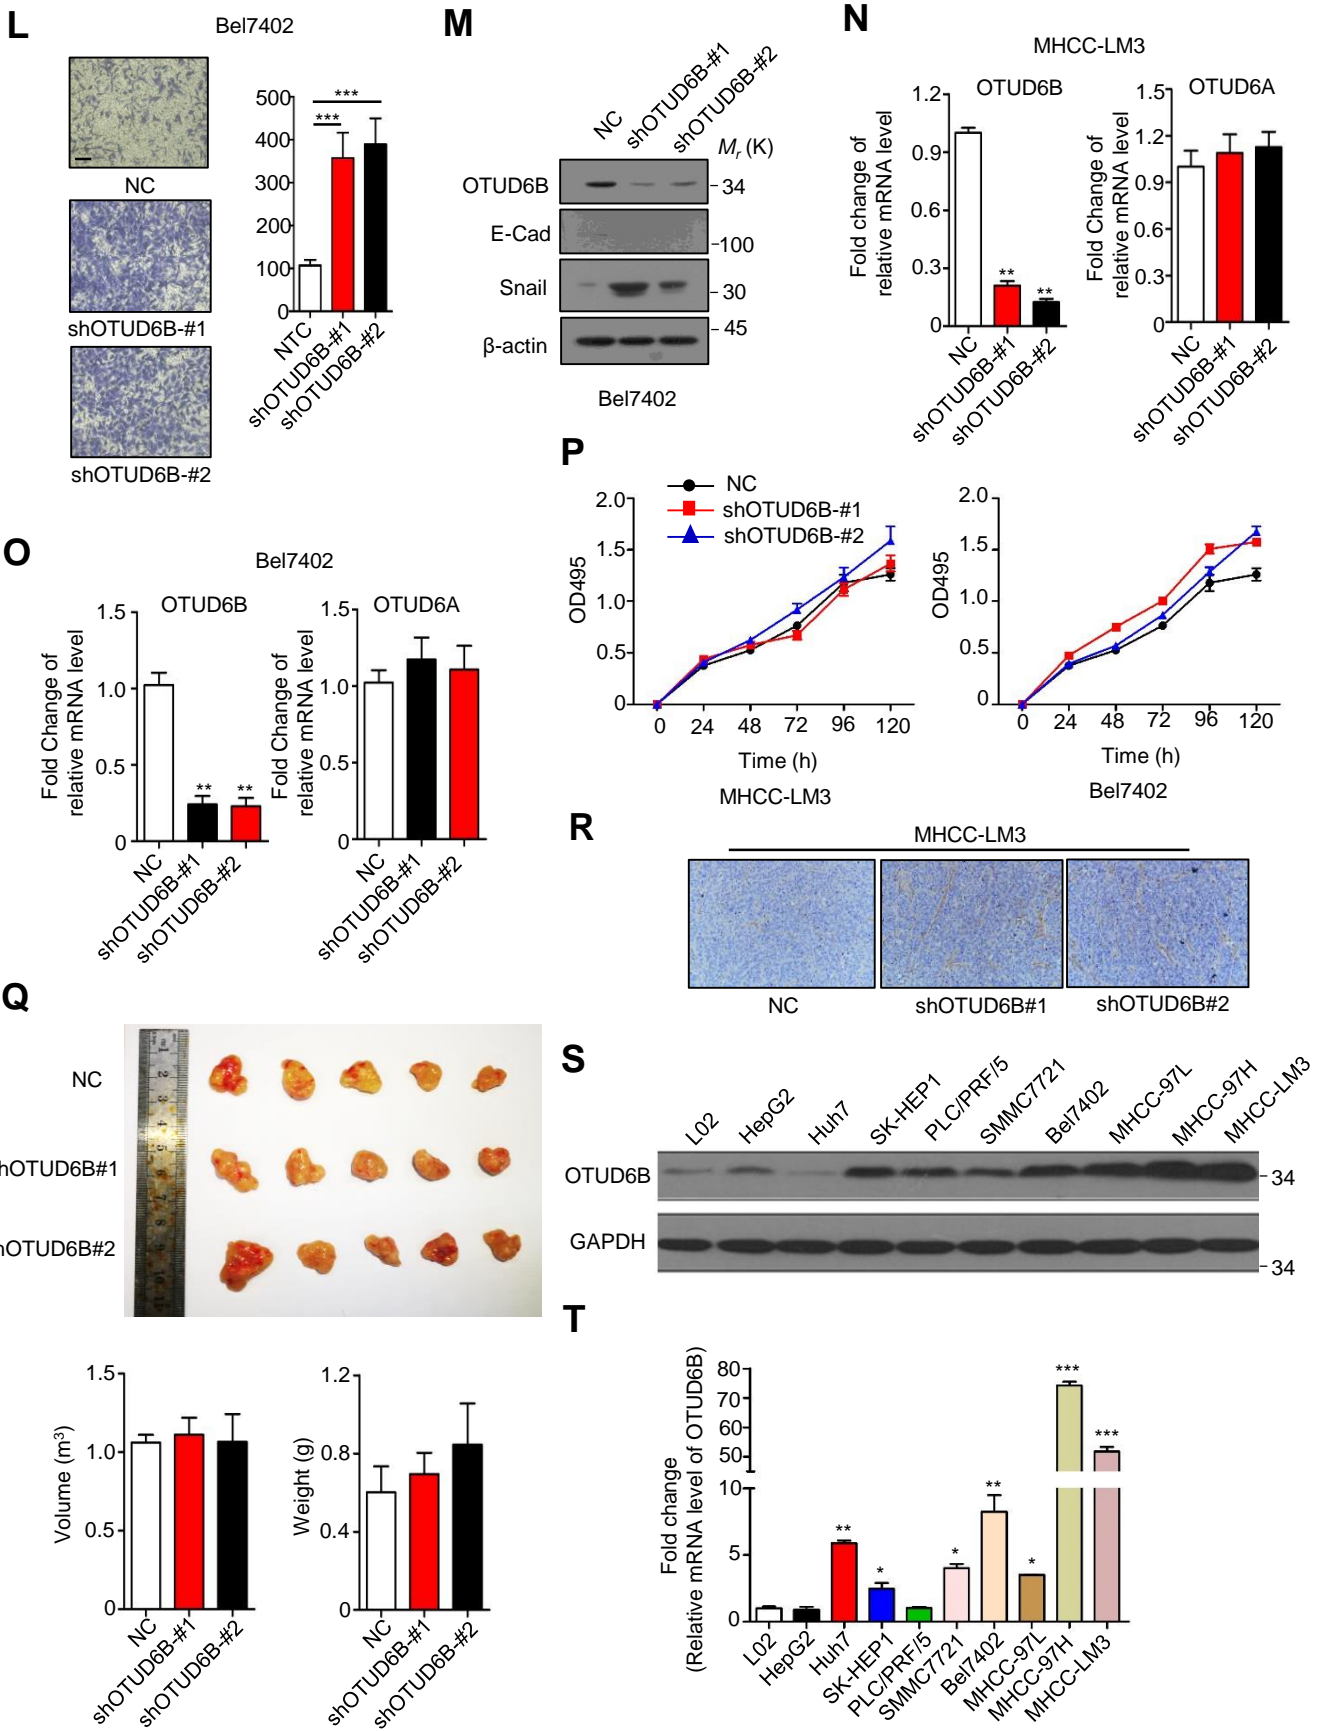



**Supplemental Figure 1. OTUD6B suppresses HCC metastasis.** (A) Scatter plot of 98 members of DUBs mRNA expression in human HCC tissues from TCGA data of National Cancer Institute, USA. The X-axis represents the value of log<sub>2</sub> (fold change of DUBs PKFM in tumor tissues (T) / non-tumor liver tissue (NT) in HCC patients, and the Y-axis represents the value of false positive rate (FDR). (B) Scatter plot of the protein levels of OTU members in human HCC tissues from CNHPP data. The X-axis represents the fold change of OTUs iBQ in tumor tissues (T) / non-tumor liver tissue (NT) in HCC patients, and the Y-axis represents the value of false positive rate (FDR). (C-K) Transwell assays were used to test the effect of depletion of OTU family DUB members, including OTUB1 (C), OTUB2 (D), OTUD2 (D), OTUD3 (E), OTUD4 (F), OTUD5 (G), OTUD6B (H), OTUD7B (I) or OTULIN (K) on cell migration in MHCC-LM3 cells. (L) Transwell assays were used to examine the effect of depletion of OTUD6B on cell migration in Bel7402 cell. Results are shown as mean ± s.d. n=3 independent experiments. \*\*, P < 0.01, \*\*\*, P < 0.001, student *t* test. (M) Immunoblot assays were conducted with indicated antibodies in HCC cells (Bel7402) with OTUD6B stable knockdown. (N, O) Real time Q-PCR assays were performed to test the mRNA level of OTUD6B and OTUD6A in MHCC-LM3 (N) and Bel7402 (O) cells. Results are shown as mean ± s.d. n=3 independent experiments. \*\*, P < 0.01, student *t* test. (P) MTS assays were used to examine cell proliferation of HCC cells with OTUD6B knockdown. (Q) 5×10<sup>6</sup> MHCC-LM3 cells with indicated shRNA were injected into nude mice subcutaneously. The mice were euthanized 6 weeks later by a cervical dislocation. Three dimensions of tumors were measured with caliper and tumor volume was calculated with formula length x width x depth x 0.52 (mm<sup>3</sup>). The tumor weight was calculated and shown. Results are shown as mean ± s.d. n=5 independent experiments. (R) Immunohistochemistry (IHC) was performed with anti-CD31 antibody on tumor tissues. (S, T) The protein (S) and mRNA (T) level of

OTUD6B in a panel of HCC cell lines. Results are shown as mean  $\pm$  s.d. n=3 independent experiments. \*, P < 0.05, \*\*, P < 0.01, \*\*\*, P < 0.001, student *t* test.

**A**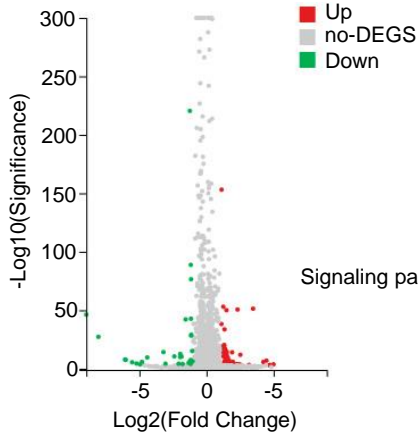**B**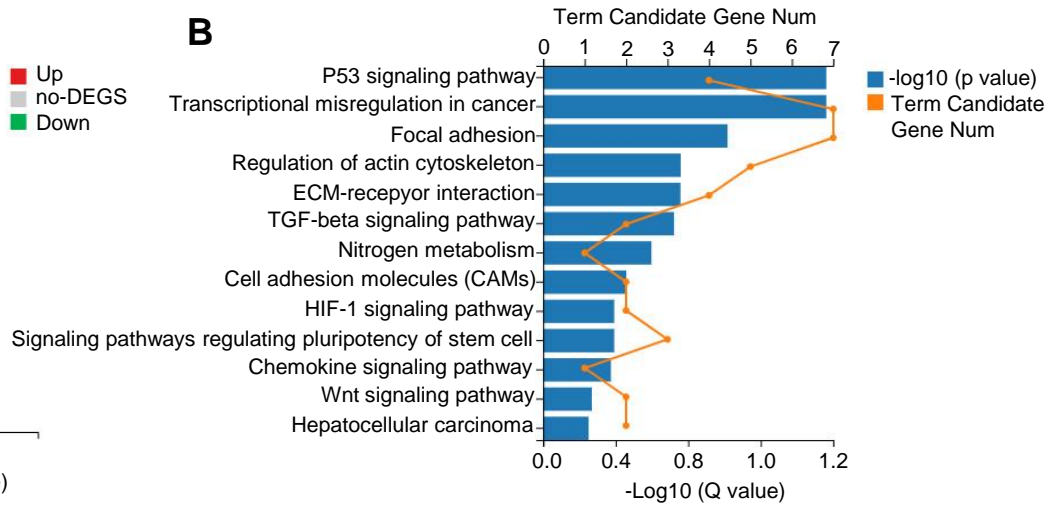**C**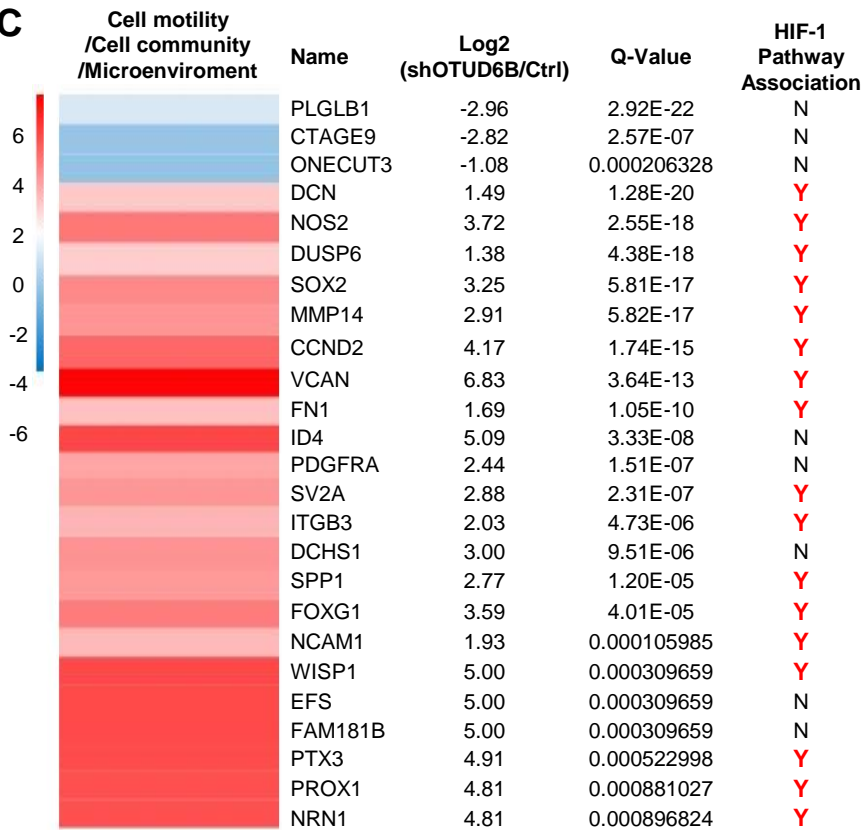**D**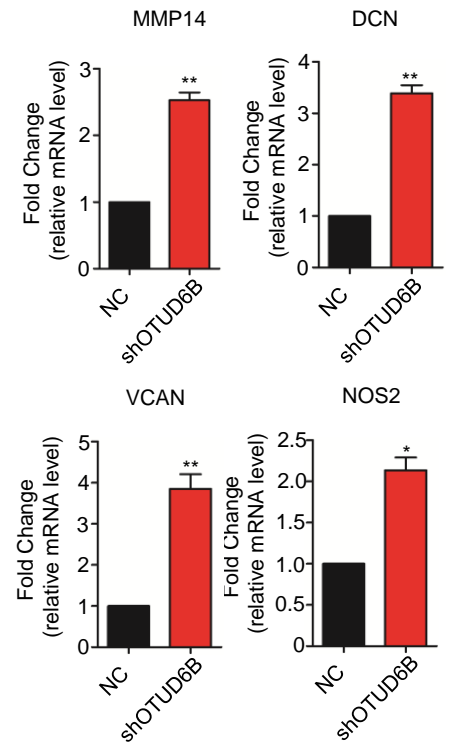**E**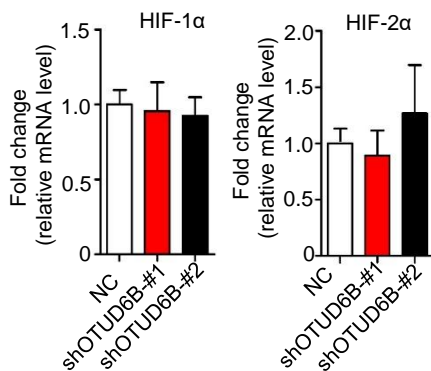**F**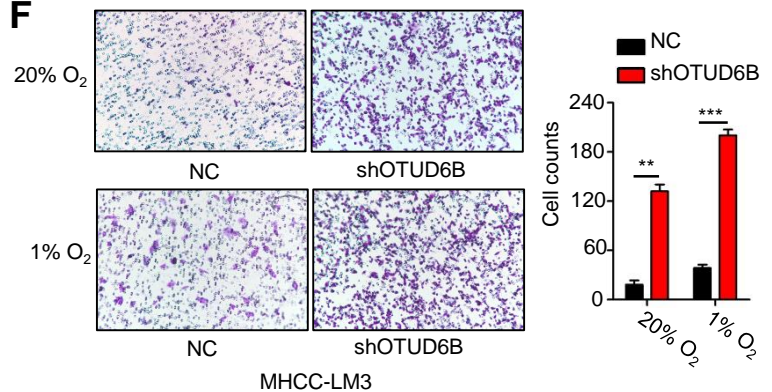

**G**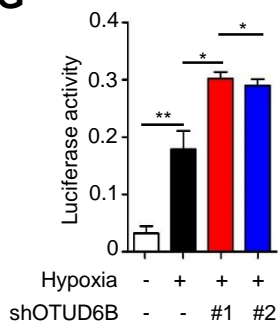**H**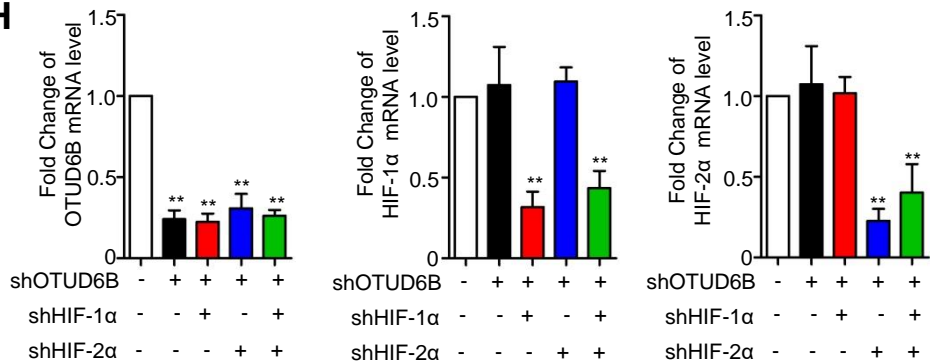**I**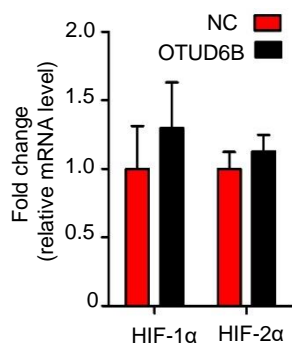**J**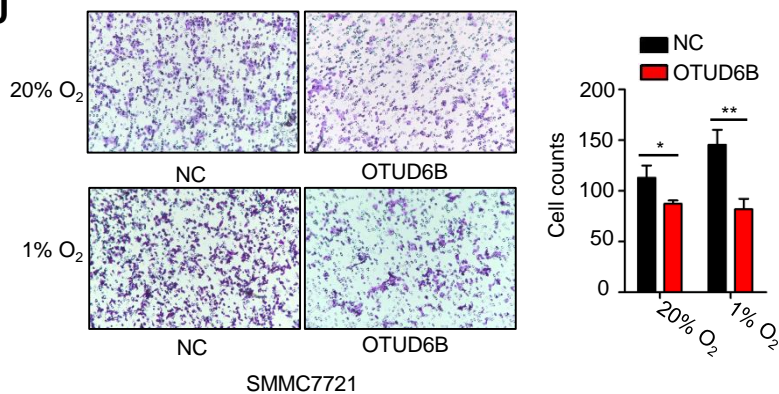**K**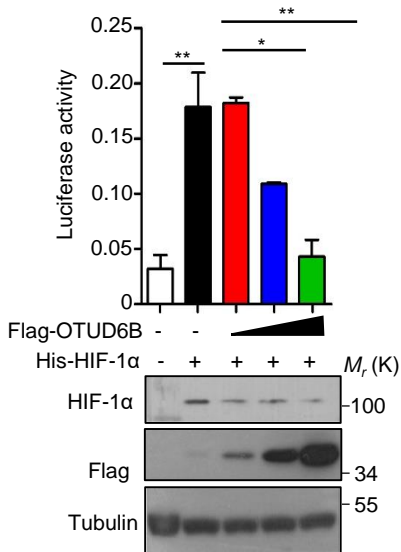**L**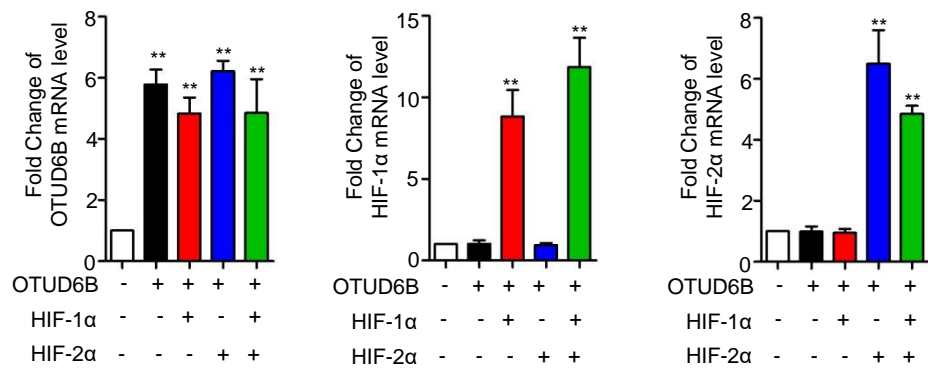

**Supplemental Figure 2. OTUD6B negatively regulates HIF pathway.** (A) Identification of the different expression genes (DEGs) was graphed in volcano plot. (B) Gene Ontology (GO) enrichment analysis for biological process, cell component, and molecular function of DEGs. The  $-\log_{10}$  (Q value of enrichment) is shown on x axis; the numbers represent the number of associated proteins for each term. (C) The selected genes involved in cell motility, cell community and microenvironments are shown as a heatmap. (D) Real-time Q-PCR assays were used to confirm the results of RNA-Seq. (E) Real time Q-PCR was used to examine the mRNA level of HIF-1 $\alpha$  and HIF-2 $\alpha$  in MHCC-LM3 cells transfected with indicated shRNA. (F) Transwell assays were used to examine the effect of depletion of OTUD6B on cell migration in MHCC-LM3 cell under normoxia and hypoxia. (G) Fold change of the relative luciferase activity was examined by luciferase-reporter assay in OTUD6B knockdown and NC HCC cells which were incubated under normoxia or hypoxia for 24 hours. (H) Real-time Q-PCR assays were used to determine the expression of indicated genes in MHCC-LM3 cells transfected with indicated shRNA. (I) Real time Q-PCR was used to examine the mRNA level of HIF-1 $\alpha$  and HIF-2 $\alpha$  in SMMC7721 cells with ectopic OTUD6B overexpression. (J) Transwell assays were used to examine the effect of ectopic OTUD6B on cell migration in SMMC7721 cell. (K) Fold change of the relative luciferase activity was examined by luciferase-reporter assay in HCC cells transfected with indicated constructs. (L) Real time Q-PCR assays were used to determine the expression of indicated genes in SMMC7721 cells with stable overexpression of indicated genes. (Results are shown as mean  $\pm$  s.d. n=3 independent experiments. \*, P < 0.05, \*\*, P < 0.01, \*\*\*, P < 0.001, student *t* test.)

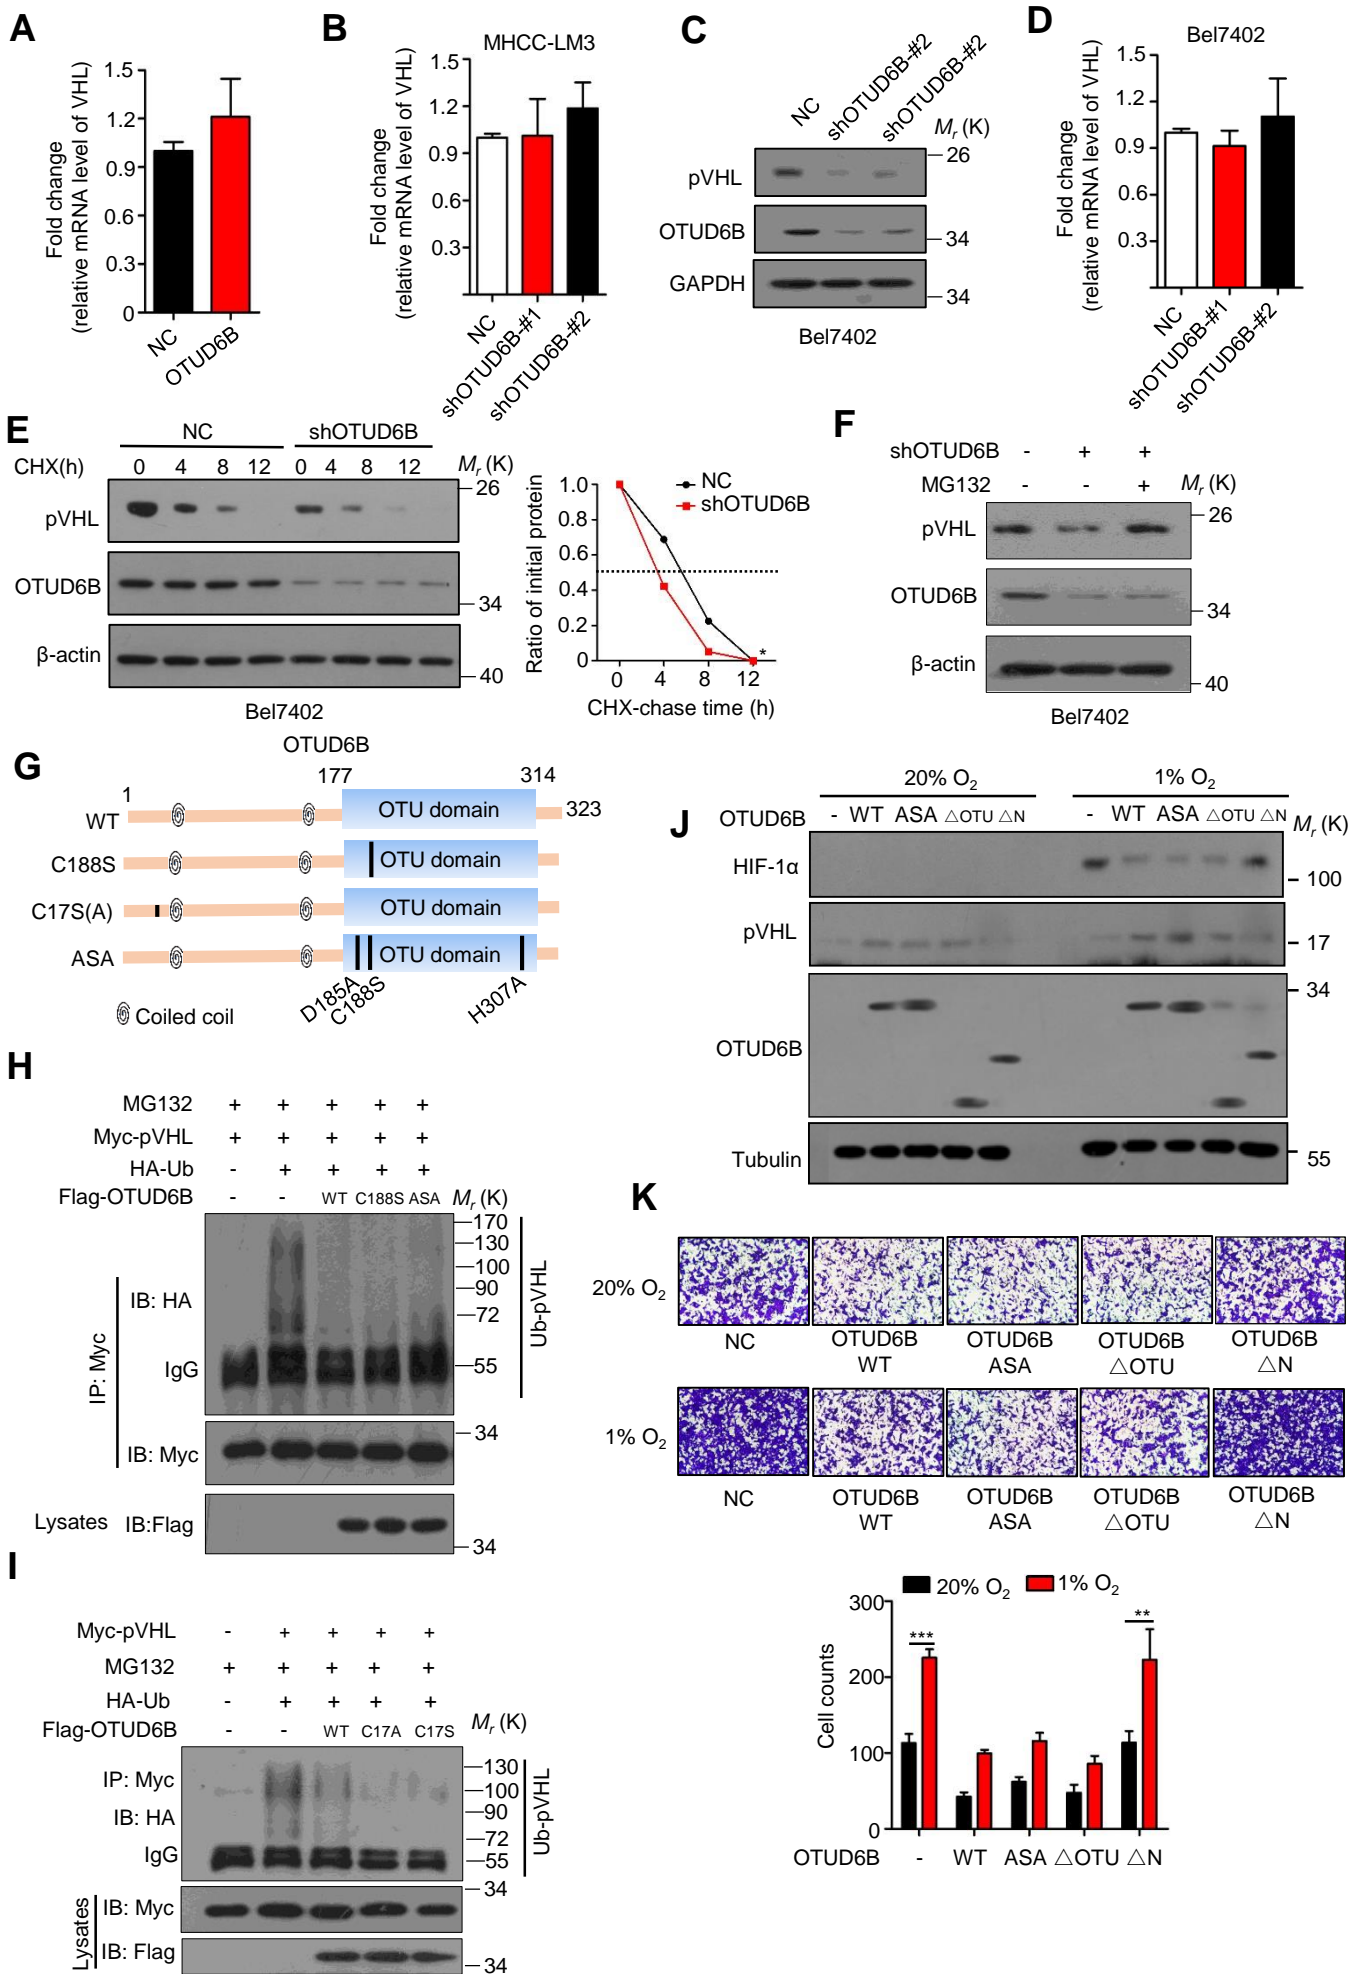



**Supplemental Figure 3. OTUD6B deubiquitylates and stabilizes pVHL in an OTU-independent manner.** (A) Real time Q-PCR was used to examine the mRNA level of pVHL in SMMC7721 cells with stable OTUD6B overexpression. (B) Real-time Q-PCR assays were used to determine the expression of VHL in MHCC-LM3 cells with OTUD6B depletion. (C) Immunoblot assays were conducted with indicated antibodies in HCC cells (Bel7402) with OTUD6B stable knockdown. (D) Real time Q-PCR was used to examine the mRNA level of pVHL in Bel7402 cells with stable OTUD6B knockdown. (E) Bel7402 HCC cells were treated with 10 $\mu$ g/ml cycloheximide (CHX), and collected at the indicated times for western blot. Quantification of pVHL levels relative to GAPDH is shown. Results are shown as mean  $\pm$  s.d. n=3 independent experiments. \*\*, P <0.01, two-way ANOVA test. (F) Immunoblot assays were conducted with indicated antibodies in HCC cells (Bel7402) with OTUD6B stable knockdown. (G) Overview of the structures of OTUD6B wild type and different truncates. (H, I) HA-Ub was co-transfected together with indicated constructs into HEK293T cells. Cells were treated with MG132 for 8h before collection. Then pVHL was immunoprecipitated with anti-myc antibody and immunoblotted with anti-HA antibody. (J) Immunoblot assays were conducted with indicated antibodies in HCC cells (SMMC7721) with stable overexpression of OTUD6B wild type and different truncates. (K) Transwell assays were used to examine the effect of OTUD6B wild type and different truncates on cell migration in SMMC7721 cell. Results are shown as mean  $\pm$  s.d. n=3 independent experiments. \*\*, P < 0.01, \*\*\*, P < 0.001, student *t* test.

**A**

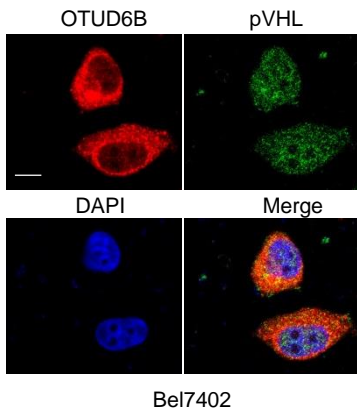

**B**

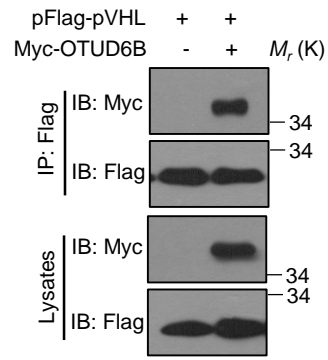

**Supplemental Figure 4. OTUD6B interacts with pVHL.** (A) Immunofluorescence staining was performed in HCC cells (Bel7402) with anti-OTUD6B and pVHL antibodies to determine the co-localization of these two proteins in HCC cells (scale bar, 10  $\mu$ m). (B) The lysates of HEK293T cells transfected with indicated constructs were subjected to immunoprecipitation with anti-Flag. The immunoprecipitates or the eluates were then blotted.

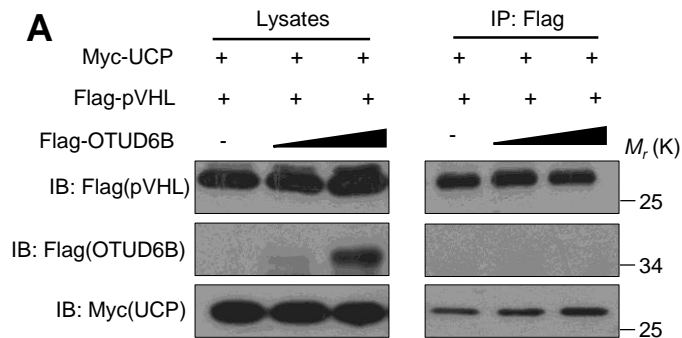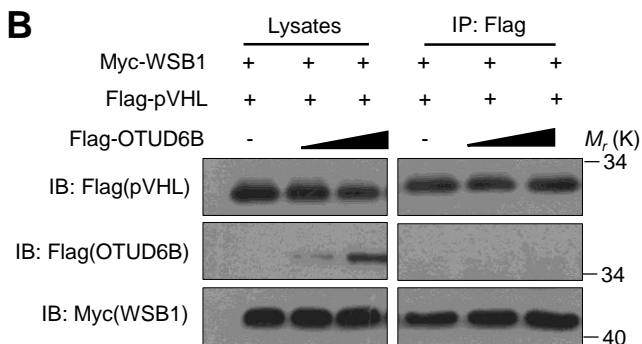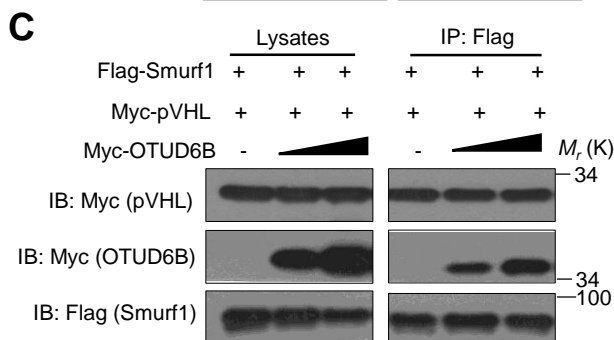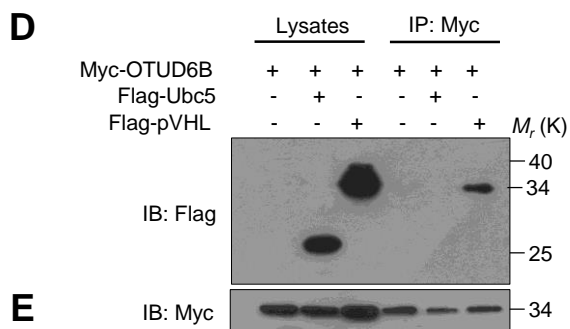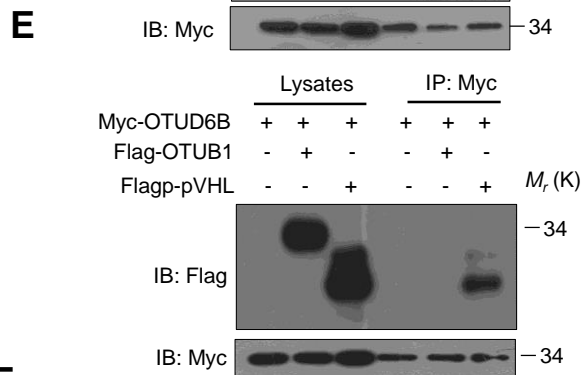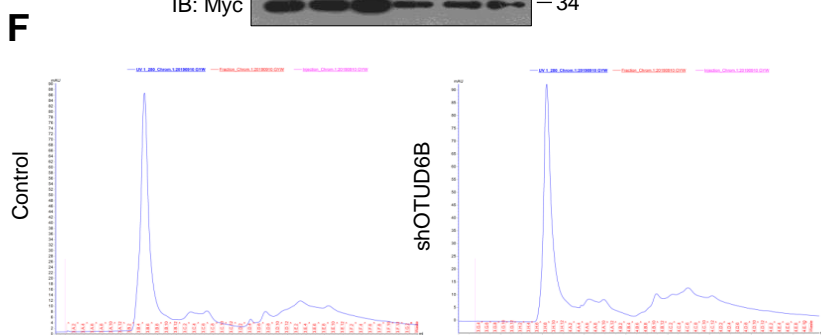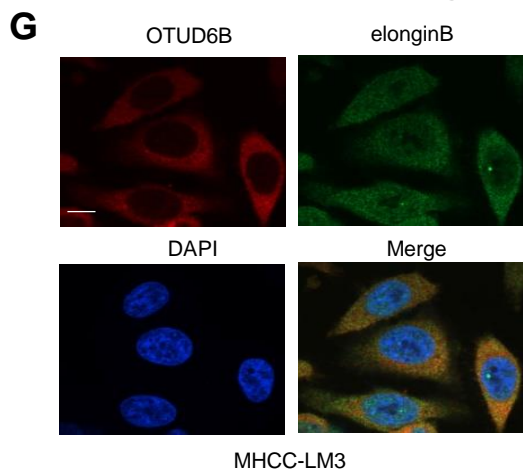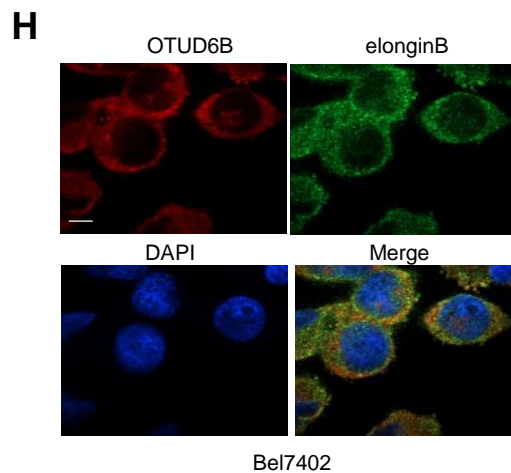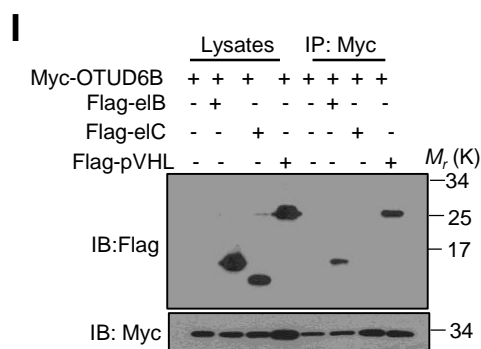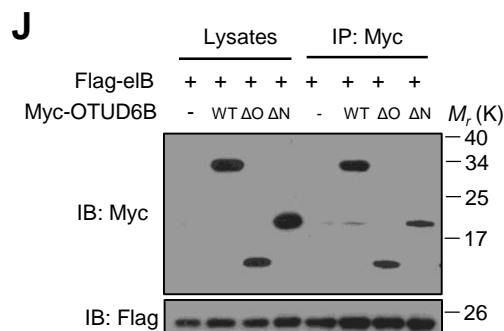

**Supplemental Figure 5. OTUD6B interacts with elongin B and enhances the binding of pVHL and elongin C.** (A, B, C) Increasing amounts of myc or flag-OTUD6B were co-transfected together with indicated constructs into HEK293T cells and the lysates were subject to immunoprecipitation with anti-myc or flag antibody. The lysates and immunoprecipitates were then blotted. (D, E) The lysates of HEK293T cells transfected with indicated constructs were subjected to immunoprecipitation with anti-Myc. The immunoprecipitates or the eluates were then blotted. (F) MHCC-LM3 Cells with NC or OTUD6B knockdown were treated with MG132 for 8 hrs, and then lysed in 0.5 ml of CHAPS lysis buffer. 500  $\mu$ l of the lysate was loaded onto a Superdex 200 10/300 GL column. Chromatography was performed on the AKTA-FPLC with CHAPS buffer. UV280 of different fractions was recorded. (G, H) Immunofluorescence staining was performed in HCC cells with anti-OTUD6B and anti-elonginB antibodies to determine the co-localization of these two proteins in MHCC-LM3 (G) and Bel7402 cells (H) (scale bar, 10  $\mu$ m). (I, J) The lysates of HEK293T cells transfected with indicated constructs were subjected to immunoprecipitation with anti-Flag. The immunoprecipitates or the eluates were then blotted.

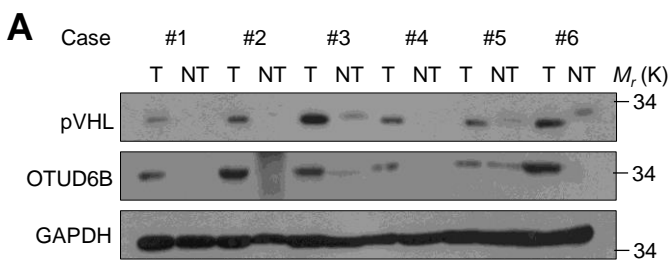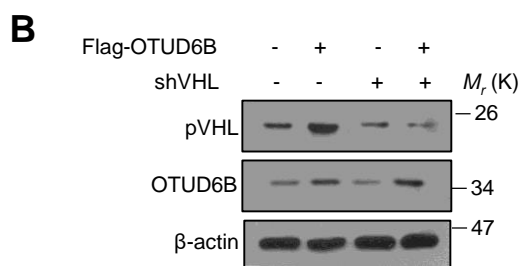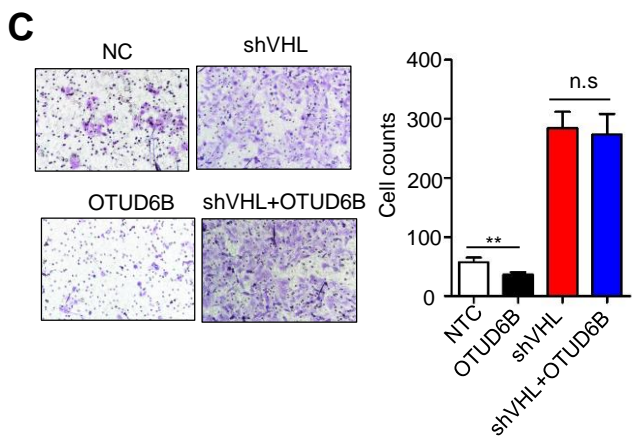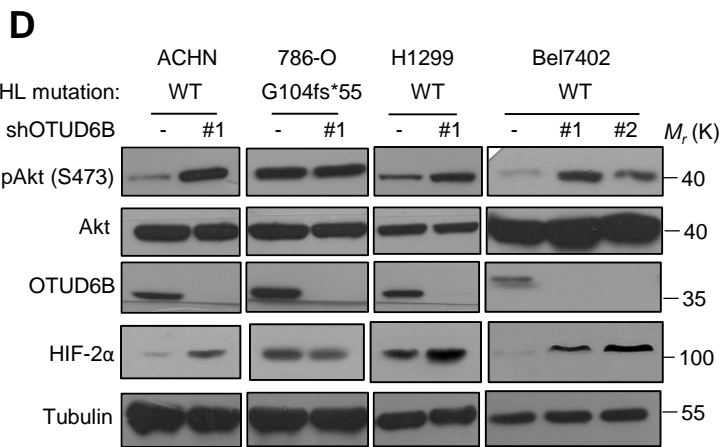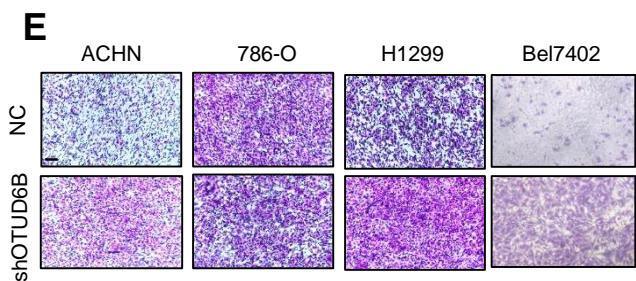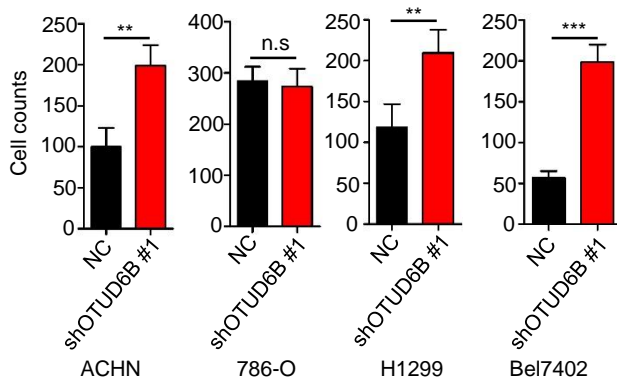



**Supplemental Figure 6. pVHL mediates the inhibitory effect of OTUD6B on HCC cell migration.** (A) Immunoblotting of pVHL and OTUD6B in human HCC tumor tissues (T) and the corresponding non-tumor liver tissues (NT). (B) Immunoblotting of pVHL and OTUD6B in HCC cells with stable overexpression or knockdown of indicated genes. (C) Transwell assays were performed to identify the capacity of migration in HCC cell with stable overexpression or knockdown of indicated genes. (D) Immunoblot assays were conducted with indicated antibodies in different types of tumor cells with OTUD6B stable knockdown. (E) Transwell assays were performed to examine the cell migration in indicated types of tumor cells. Results are shown as mean  $\pm$  s.d. n=3 independent experiments. \*, P < 0.05, \*\*, P < 0.01, \*\*\*, P < 0.001, student *t* test.

**A**

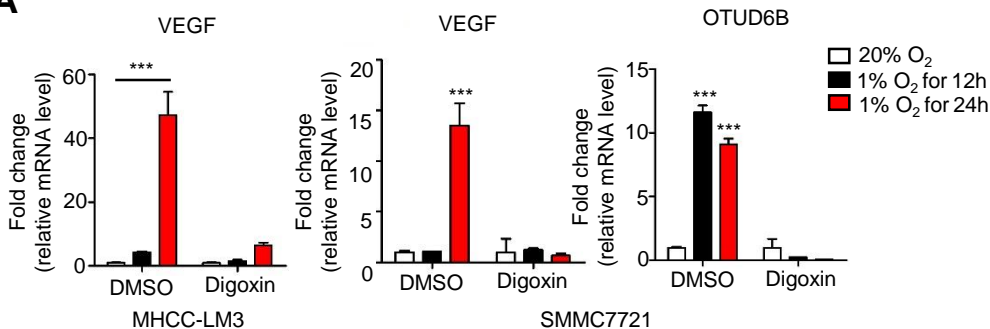

**B**

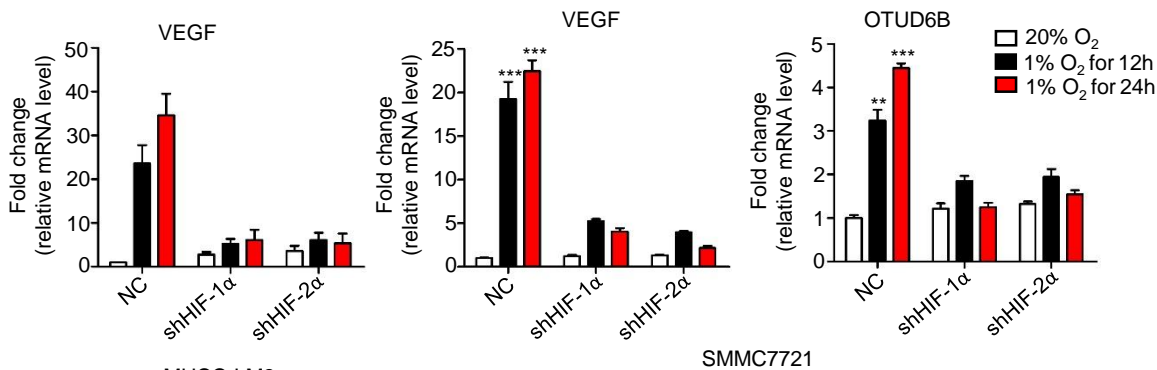

**C**

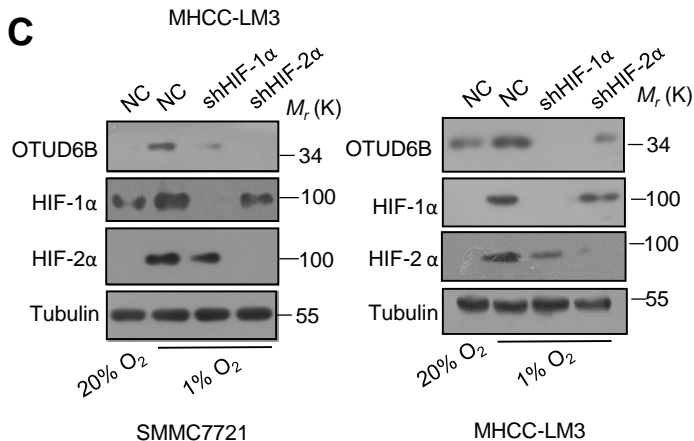

**E**

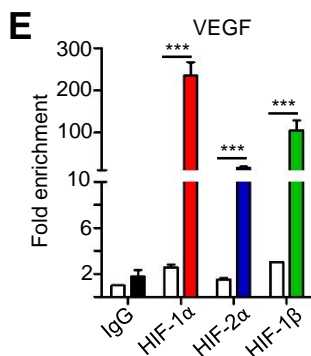

**D**

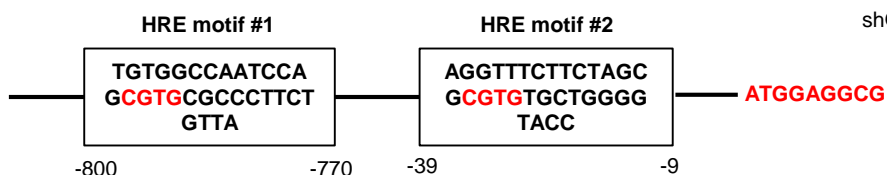

**F**

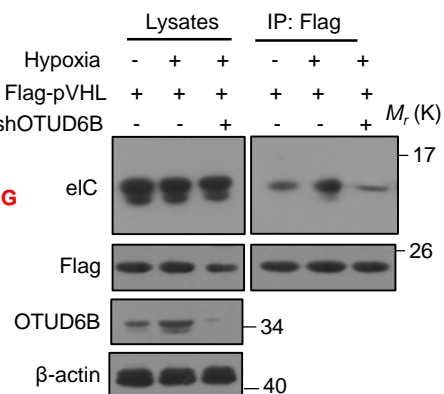

**Supplemental Figure 7. OTUD6B plays as one of target genes of HIF-1/2 $\alpha$  in HCC cells.** (A) Real time Q-PCR assays were used to determine the expression of indicated genes in HCC cells treated with Digoxin under normoxia or hypoxia. (B) Real time Q-PCR assays were used to determine the expression of indicated genes in HCC cells transfected with indicated shRNA under normoxia or hypoxia. (C) Immunoblot assays were conducted with indicated antibodies in HCC cells with HIF-1/2 $\alpha$  stable knockdown. (D) The HRE (hypoxia response element) motifs in OTUD6B promoter were shown. (E) Chip assay was used to determine the bind of HIF-1 $\alpha$ , HIF-2 $\alpha$  and HIF-1 $\beta$  to the HRE sequence in OTUD6B promoter. (F) Cell lysates of HCC cells transfected with indicated constructs were subject to immunoprecipitation with anti-flag antibodies. The immunoprecipitates were then blotted with anti-flag antibody. Results are shown as mean  $\pm$  s.d. n=3 independent experiments. \*, P < 0.05, \*\*, P < 0.01, \*\*\*, P < 0.001, student *t* test.

**Supplemental table 1. The fold change of relative mRNA level of DUBs in HCC tissues and the non-tumor liver tissue.**

| <b>Name</b>       | <b>FC Mean</b> | <b>P value</b>     |
|-------------------|----------------|--------------------|
| <b>USP family</b> |                |                    |
| USP49             | 7.869139194    | 1.09831E-07        |
| USP54             | 3.989933303    | 0.000586991        |
| USP21             | 3.714645962    | 2.90903E-11        |
| USP35             | 3.669373819    | 7.15256E-07        |
| USP46             | 2.842409008    | <b>3.37269E-08</b> |
| USP22             | 2.838782231    | 1.05271E-11        |
| USP1              | 2.684594767    | 0.000200946        |
| USP31             | 2.630570425    | 7.24325E-07        |
| USP27X            | 2.54864061     | 0.005831605        |
| USP14             | 2.414225362    | 4.62075E-09        |
| USP3              | 2.399001565    | 1.36805E-07        |
| USP11             | 2.267834522    | 5.47469E-08        |
| USP39             | 2.214987797    | 2.89526E-11        |
| USP5              | 2.206641088    | 4.79505E-13        |
| USP36             | 2.155383147    | 6.75756E-08        |
| USP37             | 2.140295652    | 6.80989E-06        |
| USP42             | 2.004362934    | 3.87037E-07        |
| USP33             | 1.970531922    | 3.21092E-05        |
| USP24             | 1.903860951    | 4.44187E-05        |
| USP40             | 1.86603239     | 5.15633E-08        |
| USP19             | 1.84826459     | 7.98074E-09        |
| USP51             | 1.829917148    | 0.181272525        |
| USP6              | 1.788081246    | 0.000309536        |
| USP30             | 1.778839229    | 1.28833E-06        |
| USP16             | 1.756498948    | 2.89561E-05        |
| USP28             | 1.753369982    | 3.0596E-05         |
| USP34             | 1.748864366    | 2.44737E-06        |
| USP7              | 1.715657352    | 2.8628E-08         |
| USP32             | 1.678044268    | 0.000160033        |
| USP4              | 1.633647317    | 9.07146E-06        |
| USP13             | 1.610067084    | 0.000530334        |
| USP48             | 1.605525165    | 5.94223E-07        |
| USP8              | 1.603138348    | 3.8408E-05         |
| USP20             | 1.59637505     | 3.38606E-08        |
| USP45             | 1.593446948    | 0.00163141         |
| USP47             | 1.515399433    | 0.000118691        |
| USP25             | 1.511177673    | 0.00197186         |
| USP12             | 1.444762184    | 0.409306427        |
| USP53             | 1.420120437    | 0.32520132         |

|                    |             |             |
|--------------------|-------------|-------------|
| USP10              | 1.415685614 | 0.000932035 |
| USP9X              | 1.413418676 | 0.000350617 |
| USP2               | 1.388377328 | 0.856827092 |
| USP9Y              | 1.364606219 | 0.367532674 |
| USPL1              | 1.266937596 | 0.120210293 |
| USP15              | 1.201895041 | 0.240381614 |
| OTUD4              | 1.174323133 | 0.449080733 |
| USP6NL             | 1.166292669 | 0.198634372 |
| USP18              | 1.159572212 | 0.381991178 |
| USP50              | 1           | 0.787503181 |
| USP38              | 0.993233066 | 0.194152828 |
| USP44              | 0.847593718 | 0.069908955 |
| USP43              | 0.846289658 | 0.312404287 |
| USP17              | NA          | NA          |
| USP17L2            | NA          | NA          |
| USP17L6P           | NA          | NA          |
| USP26              | NA          | NA          |
| USP29              | NA          | NA          |
| <b>OTU family</b>  |             |             |
| OTUB2              | 7.188493266 | 1.49632E-09 |
| OTUD7A             | 3.398297586 | 9.92464E-06 |
| OTUD6B             | 3.308460973 | 2.21158E-08 |
| OTUD3              | 2.828913095 | 8.07502E-05 |
| OTUD7B             | 2.453160651 | 5.84104E-06 |
| ALG13              | 2.112971111 | 0.000001    |
| OTUB1              | 2.088885875 | 4.47514E-10 |
| OTULIN             | 2.015745576 | 0.000001    |
| VCPIP1             | 1.676041636 | 0.000167363 |
| ZRANB1             | 1.312428885 | 0.153661456 |
| OTUD1              | 1.058225329 | 0.439996236 |
| OTUD4              | 1.174323133 | 0.449080733 |
| OTUD5              | 1.553118509 | 3.47409E-07 |
| OTUD6A             | NA          | NA          |
| <b>JAMM family</b> |             |             |
| PSMD14             | 2.054390897 | 8.66839E-07 |
| PSMD7              | 2.153836181 | 1.70315E-06 |
| PRPF8              | 2.088065448 | 0.000358897 |
| MPND               | 1.843564189 | 2.01357E-05 |
| MYSM1              | 1.577777778 | 0.000219769 |
| COPS6/CSN6         | 1.308472021 | 3.27852E-14 |
| STAMBPL1           | 0.453117352 | 2.76123E-06 |
| STAMBP             | 1.573292978 | 1.12825E-06 |
| BRCC3              | 1.234379562 | 1.15454E-06 |

|                     |             |             |
|---------------------|-------------|-------------|
| COPS5               | 1.263253397 | 1.53699E-10 |
| EIF3F               | 1.168754755 | 2.29492E-08 |
| EIF3H               | 1.594306541 | 6.65907E-08 |
| <b>MCPIP family</b> |             |             |
| ZC3H12A             | 1.051391466 | 0.14600871  |
| ZC3H12B             | 0.517522124 | 0.030769727 |
| ZC3H12C             | 1.130651558 | 0.837094549 |
| ZC3H12D             | 1.608       | 0.013614281 |
| NYNRIN              | 1.414326466 | 0.150998298 |
| KHNYN               | 0.964744058 | 3.96851E-08 |
| N4BP1               | 1.532289442 | 0.000332133 |
| <b>UCH family</b>   |             |             |
| UCHL1               | 75.09866667 | 0.066840399 |
| UCHL3               | 3.15745614  | 0.11464283  |
| UCHL5               | 1.661445244 | 7.52876E-07 |
| BAP1                | 1.012614207 | 2.50874E-11 |
| <b>MJD family</b>   |             |             |
| ATXN3               | 0.962463768 | 0.001394892 |
| JOSD1               | 0.70458079  | 5.22817E-05 |
| JOSD2               | 1.006901141 | 3.36E-08    |



**Supplemental table 2. The fold change (FC) of relative protein level of OTU**

**DUBs in human HCC tissues and the non-tumor liver tissues.**

| NO. | OTUB1 | OTUD4                | OTUD5  | OTUD6B | OTUD7B | OTULIN               | VCPIP1 | ALG13  |
|-----|-------|----------------------|--------|--------|--------|----------------------|--------|--------|
| 1   | 9.04  | T <sup>a</sup> .only | T.only | T.only | T.only | T.only               | T.only | T.only |
| 2   | 6.90  | T.only               | T.only | T.only | T.only | T.only               | T.only | T.only |
| 3   | 6.55  | T.only               | T.only | T.only | T.only | T.only               | T.only | T.only |
| 4   | 6.25  | T.only               | T.only | T.only | T.only | T.only               | 327.82 | T.only |
| 5   | 5.87  | T.only               | T.only | T.only | T.only | T.only               | 175.47 | T.only |
| 6   | 5.31  | T.only               | T.only | T.only | T.only | T.only               | 86.73  | T.only |
| 7   | 5.18  | T.only               | T.only | T.only | T.only | T.only               | 73.36  | T.only |
| 8   | 4.89  | T.only               | NA     | T.only | T.only | T.only               | 44.53  | T.only |
| 9   | 4.88  | T.only               | NA     | T.only | T.only | T.only               | 31.82  | T.only |
| 10  | 4.68  | T.only               | NA     | T.only | T.only | T.only               | 27.11  | T.only |
| 11  | 4.35  | T.only               | NA     | T.only | T.only | T.only               | 20.89  | T.only |
| 12  | 4.21  | T.only               | NA     | T.only | T.only | T.only               | 19.15  | T.only |
| 13  | 4.19  | T.only               | NA     | T.only | T.only | T.only               | 18.98  | T.only |
| 14  | 4.12  | T.only               | NA     | T.only | T.only | T.only               | 18.91  | T.only |
| 15  | 3.82  | T.only               | NA     | T.only | T.only | T.only               | 18.30  | P.only |
| 16  | 3.73  | T.only               | NA     | T.only | T.only | T.only               | 18.14  | P.only |
| 17  | 3.69  | T.only               | NA     | T.only | T.only | T.only               | 17.28  | P.only |
| 18  | 3.33  | T.only               | NA     | T.only | T.only | P <sup>b</sup> .only | 15.75  | P.only |
| 19  | 3.23  | T.only               | NA     | T.only | T.only | NA                   | 15.37  | P.only |
| 20  | 3.22  | T.only               | NA     | T.only | T.only | 66.60                | 14.88  | P.only |
| 21  | 3.15  | T.only               | NA     | T.only | T.only | 29.66                | 14.61  | P.only |
| 22  | 3.14  | T.only               | NA     | T.only | T.only | 27.95                | 12.17  | P.only |
| 23  | 3.11  | T.only               | NA     | T.only | T.only | 23.85                | 11.68  | P.only |
| 24  | 2.92  | T.only               | NA     | T.only | T.only | 20.72                | 9.80   | P.only |
| 25  | 2.90  | T.only               | NA     | T.only | T.only | 19.37                | 9.43   | P.only |
| 26  | 2.90  | T.only               | NA     | T.only | T.only | 13.93                | 9.31   | P.only |
| 27  | 2.82  | T.only               | NA     | T.only | T.only | 11.38                | 9.25   | P.only |
| 28  | 2.75  | T.only               | NA     | T.only | T.only | 10.21                | 9.12   | P.only |
| 29  | 2.72  | T.only               | NA     | T.only | T.only | 10.17                | 8.94   | P.only |
| 30  | 2.70  | T.only               | NA     | T.only | T.only | 7.74                 | 8.92   | P.only |
| 31  | 2.68  | T.only               | NA     | T.only | T.only | 7.54                 | 8.85   | P.only |
| 32  | 2.68  | T.only               | NA     | T.only | T.only | 7.30                 | 8.21   | NA     |
| 33  | 2.64  | T.only               | NA     | T.only | T.only | 7.29                 | 8.07   | NA     |
| 34  | 2.58  | T.only               | NA     | T.only | T.only | 7.17                 | 7.86   | NA     |
| 35  | 2.45  | T.only               | NA     | T.only | T.only | 6.31                 | 7.56   | NA     |
| 36  | 2.32  | T.only               | NA     | T.only | T.only | 5.93                 | 7.53   | NA     |
| 37  | 2.31  | T.only               | NA     | T.only | T.only | 5.62                 | 7.14   | 50.16  |
| 38  | 2.31  | T.only               | NA     | T.only | T.only | 5.26                 | 7.10   | 39.50  |

|    |      |        |    |        |        |      |      |       |
|----|------|--------|----|--------|--------|------|------|-------|
| 39 | 2.30 | T.only | NA | T.only | P.only | 5.14 | 6.91 | 23.87 |
| 40 | 2.26 | P.only | NA | T.only | P.only | 4.90 | 6.87 | 16.60 |
| 41 | 2.25 | P.only | NA | T.only | P.only | 4.62 | 6.76 | 16.36 |
| 42 | 2.24 | P.only | NA | T.only | NA     | 4.55 | 6.71 | 14.77 |
| 43 | 2.16 | P.only | NA | T.only | NA     | 4.31 | 6.51 | 10.37 |
| 44 | 2.10 | P.only | NA | T.only | 74.92  | 4.28 | 6.28 | 9.19  |
| 45 | 2.09 | P.only | NA | T.only | 51.76  | 4.08 | 6.23 | 8.99  |
| 46 | 2.07 | P.only | NA | T.only | 42.10  | 3.84 | 6.23 | 8.96  |
| 47 | 2.06 | P.only | NA | T.only | 26.85  | 3.75 | 5.96 | 8.62  |
| 48 | 2.04 | P.only | NA | T.only | 26.52  | 3.37 | 5.76 | 8.61  |
| 49 | 2.02 | P.only | NA | T.only | 18.11  | 3.11 | 5.49 | 7.52  |
| 50 | 1.77 | P.only | NA | T.only | 17.41  | 2.95 | 5.28 | 6.79  |
| 51 | 1.76 | P.only | NA | T.only | 16.35  | 2.73 | 5.23 | 5.83  |
| 52 | 1.74 | P.only | NA | T.only | 15.20  | 2.55 | 5.18 | 5.73  |
| 53 | 1.73 | NA     | NA | T.only | 12.82  | 2.55 | 4.93 | 5.68  |
| 54 | 1.72 | NA     | NA | T.only | 12.61  | 2.55 | 4.90 | 5.41  |
| 55 | 1.71 | NA     | NA | T.only | 11.28  | 2.48 | 4.61 | 5.32  |
| 56 | 1.68 | NA     | NA | T.only | 11.22  | 2.40 | 4.43 | 4.98  |
| 57 | 1.64 | NA     | NA | T.only | 10.46  | 2.39 | 4.13 | 4.79  |
| 58 | 1.62 | NA     | NA | T.only | 10.16  | 2.33 | 4.12 | 4.30  |
| 59 | 1.61 | NA     | NA | T.only | 9.88   | 2.20 | 4.11 | 3.98  |
| 60 | 1.61 | NA     | NA | T.only | 9.41   | 2.16 | 4.06 | 3.71  |
| 61 | 1.60 | NA     | NA | T.only | 8.85   | 2.14 | 3.73 | 3.65  |
| 62 | 1.58 | NA     | NA | T.only | 7.90   | 2.10 | 3.61 | 3.40  |
| 63 | 1.54 | NA     | NA | P.only | 7.43   | 2.07 | 3.47 | 3.31  |
| 64 | 1.54 | NA     | NA | P.only | 7.07   | 2.05 | 3.47 | 2.49  |
| 65 | 1.54 | NA     | NA | P.only | 6.77   | 2.01 | 3.38 | 2.43  |
| 66 | 1.53 | NA     | NA | P.only | 6.68   | 1.89 | 3.34 | 2.36  |
| 67 | 1.53 | NA     | NA | P.only | 6.51   | 1.87 | 3.27 | 2.30  |
| 68 | 1.52 | NA     | NA | NA     | 6.45   | 1.81 | 2.83 | 2.16  |
| 69 | 1.52 | NA     | NA | NA     | 5.98   | 1.79 | 2.75 | 1.91  |
| 70 | 1.51 | NA     | NA | NA     | 5.98   | 1.76 | 2.70 | 1.89  |
| 71 | 1.50 | 63.58  | NA | NA     | 5.83   | 1.73 | 2.61 | 1.86  |
| 72 | 1.48 | 32.05  | NA | NA     | 5.67   | 1.61 | 2.60 | 1.85  |
| 73 | 1.47 | 14.05  | NA | NA     | 5.59   | 1.59 | 2.58 | 1.84  |
| 74 | 1.47 | 11.61  | NA | NA     | 5.53   | 1.59 | 2.57 | 1.60  |
| 75 | 1.45 | 6.57   | NA | NA     | 5.26   | 1.58 | 2.57 | 1.59  |
| 76 | 1.43 | 6.45   | NA | NA     | 5.07   | 1.57 | 2.50 | 1.55  |
| 77 | 1.37 | 5.33   | NA | NA     | 4.95   | 1.50 | 2.50 | 1.49  |
| 78 | 1.36 | 3.89   | NA | NA     | 4.82   | 1.48 | 2.41 | 1.40  |
| 79 | 1.35 | 3.75   | NA | NA     | 4.53   | 1.47 | 2.24 | 1.39  |
| 80 | 1.33 | 3.21   | NA | NA     | 4.24   | 1.44 | 2.20 | 1.33  |
| 81 | 1.32 | 3.18   | NA | NA     | 4.13   | 1.39 | 2.12 | 1.20  |

|     |      |      |    |       |      |      |      |      |
|-----|------|------|----|-------|------|------|------|------|
| 82  | 1.32 | 2.87 | NA | NA    | 3.96 | 1.38 | 1.98 | 1.14 |
| 83  | 1.31 | 2.82 | NA | NA    | 3.81 | 1.29 | 1.90 | 1.13 |
| 84  | 1.31 | 2.76 | NA | NA    | 3.52 | 1.28 | 1.86 | 1.06 |
| 85  | 1.27 | 2.32 | NA | NA    | 3.46 | 1.27 | 1.85 | 1.05 |
| 86  | 1.24 | 2.25 | NA | NA    | 3.41 | 1.24 | 1.79 | 0.98 |
| 87  | 1.22 | 2.05 | NA | NA    | 3.15 | 1.20 | 1.74 | 0.91 |
| 88  | 1.22 | 1.95 | NA | NA    | 3.11 | 1.18 | 1.73 | 0.90 |
| 89  | 1.18 | 1.80 | NA | NA    | 3.05 | 1.18 | 1.67 | 0.75 |
| 90  | 1.17 | 1.54 | NA | NA    | 3.02 | 1.17 | 1.63 | 0.75 |
| 91  | 1.17 | 1.50 | NA | NA    | 2.61 | 1.16 | 1.62 | 0.71 |
| 92  | 1.16 | 1.38 | NA | NA    | 2.40 | 1.12 | 1.61 | 0.66 |
| 93  | 1.16 | 1.26 | NA | NA    | 2.19 | 1.10 | 1.59 | 0.66 |
| 94  | 1.14 | 1.26 | NA | NA    | 2.12 | 1.05 | 1.50 | 0.62 |
| 95  | 1.07 | 1.21 | NA | 24.97 | 2.04 | 1.05 | 1.32 | 0.60 |
| 96  | 1.05 | 1.15 | NA | 16.78 | 2.03 | 0.98 | 1.31 | 0.58 |
| 97  | 1.05 | 1.13 | NA | 8.58  | 1.95 | 0.98 | 1.23 | 0.57 |
| 98  | 1.05 | 1.11 | NA | 8.16  | 1.89 | 0.95 | 1.21 | 0.52 |
| 99  | 1.04 | 0.97 | NA | 7.16  | 1.81 | 0.95 | 1.21 | 0.51 |
| 100 | 1.04 | 0.83 | NA | 7.13  | 1.72 | 0.94 | 1.18 | 0.46 |
| 101 | 0.98 | 0.83 | NA | 5.41  | 1.60 | 0.93 | 1.10 | 0.45 |
| 102 | 0.98 | 0.78 | NA | 5.16  | 1.53 | 0.92 | 1.00 | 0.42 |
| 103 | 0.97 | 0.74 | NA | 4.18  | 1.34 | 0.79 | 0.89 | 0.41 |
| 104 | 0.97 | 0.71 | NA | 3.84  | 0.91 | 0.78 | 0.86 | 0.39 |
| 105 | 0.95 | 0.71 | NA | 3.81  | 0.83 | 0.71 | 0.80 | 0.38 |
| 106 | 0.92 | 0.63 | NA | 3.22  | 0.82 | 0.63 | 0.80 | 0.38 |
| 107 | 0.88 | 0.52 | NA | 2.99  | 0.60 | 0.52 | 0.56 | 0.37 |
| 108 | 0.84 | 0.36 | NA | 2.50  | 0.60 | 0.50 | 0.52 | 0.35 |
| 109 | 0.70 | 0.20 | NA | 2.14  | 0.51 | 0.42 | 0.47 | 0.32 |
| 110 | 0.65 | 0.12 | NA | 1.32  | 0.51 | 0.38 | 0.24 | 0.27 |
| 111 | 0.42 | 0.05 | NA | 0.65  | 0.33 | 0.36 | 0.04 | 0.09 |

a) Tumor; b) Peri-tumor

**Supplemental table 3. Clinicopathological significance of OTUD6B in human**

**HCC tissues.**

| Clinicopathological indexes |          | No. of patients (%) (n=89) | Tumor OTUD6B Protein level |               |                |                |
|-----------------------------|----------|----------------------------|----------------------------|---------------|----------------|----------------|
|                             |          |                            | Low(%) (n=18)              | mid(%) (n=52) | High(%) (n=19) | <i>p</i> value |
| Age(year)                   | ≤50      | 40(44.9)                   | 11(61.1)                   | 20(38.5)      | 9(47.4)        | 0.4181         |
|                             | >50      | 49(55.1)                   | 7(38.9)                    | 32(61.5)      | 10(52.6)       |                |
| Gender                      | Female   | 10(11.2)                   | 2(11.1)                    | 5(9.62)       | 3(15.8)        | 0.644          |
|                             | Male     | 79(88.8)                   | 16(88.9)                   | 47(90.4)      | 16(84.2)       |                |
| HBsAg                       | Negative | 18(20.5)                   | 3(16.7)                    | 10(19.2)      | 5(26.3)        | 0.4642         |
|                             | Positive | 70(79.5)                   | 15(83.3)                   | 41(78.8)      | 14(73.7)       |                |
| HBcAb                       | Negative | 7(8.1)                     | 2(11.1)                    | 4(7.7)        | 1(5.3)         | 0.5422         |
|                             | Positive | 79(91.9)                   | 16(88.9)                   | 46(88.5)      | 17(89.5)       |                |
| AFP (ng/ml)                 | ≤20      | 35(39.8)                   | 2(11.1)                    | 27(51.9)      | 6(31.6)        | 0.2262         |
|                             | >20      | 53(60.2)                   | 16(88.9)                   | 24(46.2)      | 13(68.4)       |                |
| GGT (U/L)                   | ≤54      | 51(58.0)                   | 8(44.4)                    | 27(51.9)      | 16(84.2)       | 0.0134         |
|                             | >54      | 37(42.0)                   | 10(55.6)                   | 24(46.2)      | 3(15.8)        |                |
| Liver cirrhosis             | No       | 9(10.2)                    | 2(11.1)                    | 5(9.6)        | 2(10.5)        | 0.4408         |
|                             | yes      | 79(89.8)                   | 16(88.9)                   | 31(59.6)      | 32(168.4)      |                |
| Tumor size(cm)              | ≤5       | 62(69.7)                   | 12(66.7)                   | 34(65.4)      | 16(84.2)       | 0.2374         |
|                             | >5       | 27(30.3)                   | 6(33.3)                    | 18(34.6)      | 3(15.8)        |                |
| Tumor number                | Single   | 78(87.6)                   | 15(83.3)                   | 46(88.5)      | 17(89.5)       | 0.5746         |
|                             | Multiple | 11(12.4)                   | 3(16.7)                    | 6(11.5)       | 2(10.5)        |                |
| Microvascular invasion      | absence  | 57(73.1)                   | 11(61.1)                   | 32(61.5)      | 14(73.7)       | 0.5395         |
|                             | present  | 21(26.9)                   | 4(22.2)                    | 14(26.9)      | 3(15.8)        |                |
| Tumor encapsulation         | complete | 41(46.6)                   | 7(38.9)                    | 25(48.1)      | 9(47.4)        | 0.6131         |
|                             | none     | 47(53.4)                   | 11(61.1)                   | 26(50)        | 10(52.6)       |                |
| Histological grade          | I+II     | 42(47.7)                   | 5(27.8)                    | 26(50)        | 11(57.9)       | 0.0921         |
|                             | III+IV   | 46(52.3)                   | 12(66.7)                   | 26(50)        | 8(42.1)        |                |
| TNM stage                   | I        | 57(64.0)                   | 11(61.1)                   | 32(61.5)      | 13(68.4)       | 0.4884         |
|                             | II+III   | 32(36.0)                   | 7(38.9)                    | 20(38.5)      | 5(26.3)        |                |
| Recurrence                  | No       | 40(44.9)                   | 6(33.3)                    | 21(40.4)      | 13(68.4)       | 0.0304         |
|                             | Yes      | 49(55.1)                   | 12(66.7)                   | 31(59.6)      | 6(31.6)        |                |
| Death                       | No       | 57(64.0)                   | 9(50)                      | 31(59.6)      | 17(89.5)       | 0.0117         |
|                             | Yes      | 32(36.0)                   | 9(50)                      | 21(40.4)      | 5(26.3)        |                |

**Supplemental table 4. Differential gene expression in HCC cells with OTUD6B****knockdown and NTC**

| Gene ID   | Ctrl FPKM | shOTUD6B FPKM | log2(shOTUD6B/ Ctrl) | Qvalue(Ctrl-vs -shOTUD6B) | Pvalue(Ctrl-vs-shOTUD6B) |
|-----------|-----------|---------------|----------------------|---------------------------|--------------------------|
| 100529144 | 0.42      | 0.97          | 1.20                 | 1.25E-12                  | 3.66E-14                 |
| 100532726 | 0.01      | 0.20          | 4.55                 | 1.03E-07                  | 5.64E-09                 |
| 10098     | 0.01      | 0.11          | 3.81                 | 4.47E-06                  | 3.29E-07                 |
| 101060179 | 0.26      | 0.66          | 1.36                 | 3.78E-05                  | 3.47E-06                 |
| 10178     | 0.01      | 0.04          | 3.30                 | 0.000523143               | 6.88E-05                 |
| 10215     | 0.01      | 0.41          | 6.19                 | 3.97E-17                  | 7.37E-19                 |
| 102723722 | 0.40      | 1.16          | 2.64                 | 3.35E-23                  | 3.80E-25                 |
| 102724994 | 0.12      | 0.45          | 2.01                 | 8.81E-09                  | 4.16E-10                 |
| 10278     | 0.00      | 0.08          | 5.00                 | 0.000309659               | 3.75E-05                 |
| 10391     | 0.01      | 0.26          | 4.37                 | 9.89E-14                  | 2.57E-15                 |
| 10395     | 0.01      | 0.09          | 3.21                 | 6.39E-07                  | 4.06E-08                 |
| 10485     | 0.09      | 0.53          | 2.52                 | 6.02E-06                  | 4.57E-07                 |
| 10631     | 0.07      | 1.55          | 4.78                 | 5.68E-81                  | 1.44E-83                 |
| 116448    | 0.02      | 0.40          | 4.44                 | 1.82E-14                  | 4.33E-16                 |
| 1462      | 0.00      | 0.13          | 6.83                 | 3.64E-13                  | 1.00E-14                 |
| 1634      | 0.70      | 1.97          | 1.49                 | 1.28E-20                  | 1.84E-22                 |
| 165       | 0.04      | 0.16          | 1.94                 | 4.35E-05                  | 4.07E-06                 |
| 1809      | 0.01      | 0.09          | 2.93                 | 6.69E-06                  | 5.15E-07                 |
| 1848      | 0.47      | 1.22          | 1.38                 | 4.38E-18                  | 7.64E-20                 |
| 220382    | 0.00      | 0.12          | 5.00                 | 0.000309659               | 3.75E-05                 |
| 221981    | 0.00      | 0.03          | 5.09                 | 0.000183799               | 2.06E-05                 |
| 2290      | 0.01      | 0.11          | 3.59                 | 4.01E-05                  | 3.73E-06                 |
| 23266     | 0.00      | 0.05          | 4.25                 | 0.000128334               | 1.38E-05                 |
| 23302     | 0.01      | 0.09          | 3.09                 | 3.28E-06                  | 2.35E-07                 |
| 2335      | 0.07      | 0.23          | 1.69                 | 1.05E-10                  | 3.74E-12                 |
| 23767     | 0.01      | 0.09          | 3.17                 | 3.43E-05                  | 3.13E-06                 |
| 2583      | 0.01      | 0.08          | 4.57                 | 1.00E-05                  | 8.02E-07                 |
| 2841      | 0.05      | 0.18          | 2.05                 | 0.000676782               | 9.36E-05                 |
| 28951     | 0.01      | 0.31          | 5.02                 | 2.52E-22                  | 3.19E-24                 |
| 2953      | 0.12      | 0.71          | 2.63                 | 4.28E-09                  | 1.93E-10                 |
| 3400      | 0.00      | 0.12          | 5.09                 | 3.33E-08                  | 1.72E-09                 |
| 341640    | 0.08      | 0.25          | 1.65                 | 6.70E-23                  | 7.71E-25                 |
| 3485      | 0.09      | 2.09          | 4.89                 | 4.07E-47                  | 2.02E-49                 |
| 3488      | 0.02      | 0.16          | 3.15                 | 1.59E-12                  | 4.74E-14                 |
| 357       | 0.01      | 0.11          | 3.13                 | 1.93E-06                  | 1.31E-07                 |
| 3690      | 0.04      | 0.15          | 2.03                 | 4.73E-06                  | 3.51E-07                 |
| 3737      | 0.00      | 0.03          | 5.50                 | 1.00E-05                  | 7.97E-07                 |
| 3800      | 0.00      | 0.06          | 4.80                 | 3.11E-07                  | 1.86E-08                 |

|        |      |      |      |             |             |
|--------|------|------|------|-------------|-------------|
| 4133   | 0.02 | 0.14 | 2.49 | 5.78E-08    | 3.06E-09    |
| 4239   | 0.06 | 0.29 | 2.22 | 4.48E-05    | 4.22E-06    |
| 4313   | 0.03 | 0.13 | 2.32 | 0.000258269 | 3.04E-05    |
| 4323   | 0.06 | 0.41 | 2.91 | 5.82E-17    | 1.10E-18    |
| 441519 | 0.13 | 0.64 | 2.34 | 4.53E-06    | 3.35E-07    |
| 4684   | 0.03 | 0.11 | 1.93 | 0.000105985 | 1.11E-05    |
| 4811   | 0.01 | 0.12 | 4.03 | 1.63E-10    | 6.03E-12    |
| 4843   | 0.02 | 0.33 | 3.72 | 2.55E-18    | 4.40E-20    |
| 5098   | 0.01 | 0.22 | 4.23 | 2.54E-14    | 6.19E-16    |
| 51299  | 0.00 | 0.12 | 4.81 | 0.000896824 | 0.000128772 |
| 5156   | 0.03 | 0.13 | 2.44 | 1.51E-07    | 8.59E-09    |
| 51704  | 0.01 | 0.14 | 3.86 | 2.58E-06    | 1.79E-07    |
| 53826  | 0.07 | 0.52 | 3.04 | 3.21E-11    | 1.10E-12    |
| 5396   | 0.00 | 0.05 | 4.81 | 0.000881027 | 0.000126427 |
| 5453   | 0.03 | 0.15 | 2.34 | 0.000226626 | 2.62E-05    |
| 56140  | 0.05 | 0.14 | 1.44 | 0.000571728 | 7.66E-05    |
| 5625   | 0.23 | 0.72 | 1.75 | 1.21E-09    | 5.14E-11    |
| 56265  | 0.01 | 0.16 | 4.70 | 2.77E-06    | 1.96E-07    |
| 5629   | 0.00 | 0.02 | 4.81 | 0.000881027 | 0.000126427 |
| 56999  | 0.03 | 0.12 | 2.02 | 3.00E-07    | 1.79E-08    |
| 5803   | 0.02 | 0.63 | 4.86 | 2.84E-59    | 1.09E-61    |
| 5806   | 0.00 | 0.11 | 4.91 | 0.000522998 | 6.87E-05    |
| 6299   | 0.00 | 0.04 | 4.81 | 0.000881027 | 0.000126427 |
| 6507   | 0.01 | 0.23 | 4.42 | 3.19E-14    | 7.83E-16    |
| 653781 | 0.03 | 0.13 | 2.29 | 0.000906046 | 0.000130175 |
| 6657   | 0.06 | 0.54 | 3.25 | 5.81E-17    | 1.09E-18    |
| 6664   | 0.00 | 0.04 | 4.46 | 2.51E-05    | 2.19E-06    |
| 6678   | 0.10 | 1.50 | 3.87 | 1.79E-77    | 5.00E-80    |
| 6696   | 0.05 | 0.29 | 2.77 | 1.20E-05    | 9.78E-07    |
| 6925   | 0.05 | 0.22 | 2.08 | 3.70E-11    | 1.27E-12    |
| 7070   | 0.01 | 0.38 | 4.81 | 6.21E-13    | 1.77E-14    |
| 7345   | 0.06 | 0.71 | 3.49 | 7.75E-11    | 2.75E-12    |
| 752014 | 0.00 | 0.21 | 5.34 | 3.40E-05    | 3.07E-06    |
| 79870  | 0.03 | 0.18 | 2.89 | 2.56E-06    | 1.78E-07    |
| 81557  | 0.03 | 0.15 | 2.70 | 0.000207786 | 2.37E-05    |
| 81848  | 0.14 | 0.36 | 1.33 | 4.06E-08    | 2.14E-09    |
| 8293   | 0.61 | 6.68 | 2.92 | 8.52E-101   | 1.49E-103   |
| 8362   | 0.84 | 2.60 | 1.64 | 3.81E-05    | 3.51E-06    |
| 8404   | 0.05 | 0.39 | 3.12 | 1.44E-13    | 3.77E-15    |
| 8406   | 0.03 | 0.18 | 2.88 | 0.000460084 | 5.90E-05    |
| 84446  | 0.06 | 0.21 | 1.86 | 0.000246847 | 2.88E-05    |
| 85027  | 0.02 | 0.16 | 2.76 | 0.000125215 | 1.34E-05    |
| 8642   | 0.01 | 0.04 | 3.00 | 9.51E-06    | 7.53E-07    |



|      |      |      |      |             |          |
|------|------|------|------|-------------|----------|
| 8671 | 0.05 | 0.19 | 2.03 | 6.12E-10    | 2.53E-11 |
| 8728 | 0.00 | 0.10 | 5.46 | 1.49E-10    | 5.47E-12 |
| 8840 | 0.00 | 0.05 | 5.00 | 0.000309659 | 3.75E-05 |
| 894  | 0.01 | 0.16 | 4.17 | 1.74E-15    | 3.72E-17 |
| 9500 | 0.22 | 0.56 | 1.36 | 7.15E-08    | 3.86E-09 |
| 9537 | 0.61 | 0.99 | 1.11 | 2.33E-08    | 1.18E-09 |
| 9715 | 0.09 | 0.29 | 1.74 | 2.07E-08    | 1.03E-09 |
| 9865 | 0.00 | 0.09 | 4.96 | 1.75E-07    | 1.00E-08 |
| 9900 | 0.03 | 0.18 | 2.88 | 2.31E-07    | 1.34E-08 |

**Supplemental table 5. List of primers used for plasmids construction and target sequence of shRNAs.**

| Genes                                                               | Forward Primer 5'-3'                  | Reverse Primer 5'-3'                    |
|---------------------------------------------------------------------|---------------------------------------|-----------------------------------------|
| <b>Eukaryotic expression vector (pcDNA3.1-CMV backbone)</b>         |                                       |                                         |
| Flag-OTUD6B                                                         | CCCAAGCTTATGGAGCCCC<br>GGGTGAG        | CGCGGATCCTTAGCTGCAATT<br>TTCAGTAACT     |
| Flag-OTUD6B- $\Delta$ OTU                                           | CCCAAGCTTATGGAGCCCC<br>GGGTGAG        | CGCGGATCCTTACACCAAGTT<br>TGAAATGT       |
| Flag-OTUD6- $\Delta$ N                                              | CCCAAGCTT<br>CTTGAGAATCAGCCACC        | CGCGGATCCTTAGCTGCAATT<br>TTCAGTAACT     |
| Flag-OTUD6-C188S                                                    | CTATGTATAAAGCCATTGA<br>AGATCAACT      | AGTGGCCATCAGATGGAATCT<br>GT             |
| Flag-OTUD6-C17S                                                     | AGCAGGTTTCTTCTAGCGC<br>GTGTGC         | CCGGCTAGTAGGCACCTTCCA<br>C              |
| Flag-OTUD6-ASA                                                      | GCTTATAATTCGGTTACAC<br>GGTTG          | TTCTCCTAAGCCATATGCATG<br>TC             |
| Myc-pVHL-N                                                          | CGGAATTCGGATGCCCGG<br>AGGGCGG         | GGGGTACCTCATGGCAGTGTG<br>ATATTGGCAAAAAT |
| Myc-pVHL-C                                                          | CGGAATTCGGGTGTATACT<br>CTGAAAGAGC     | GGGGTACCTCAATCTCCCATC<br>CGTTGATGTG     |
| Myc-WSB1                                                            | GGAATTCGGATGGCCAGCT<br>TTCCCCGAGGGT   | CGGGGTACCCTAAATACGATA<br>CGAGAGAAACTCC  |
| Myc-elonginB                                                        | CGGAATTCGGATGGACGTG<br>TTCCTCATGATCC  | GGGGTACCTCACTGCACGGCT<br>TGTTTCATTG     |
| Myc-elonginC                                                        | ACGCGTCGACCATGGATGG<br>AGAGGAGAAAACCT | GGGGTACCTTAACAATCTAAG<br>AAGTTCGCAGCC   |
| <b>Prokaryotic expression vector (pET-28a-His or pGEX-6P-1-GST)</b> |                                       |                                         |
| His-OTUD6B                                                          | CGCGGATCCATGGAGCC                     | CCCAAGCTTTTTAGCTGCAAT                   |
| His-WSB1                                                            | CCGGAATTCATGGCCAGCT<br>TTCCCCGAG      | ACGCGTCGACCTAAATACGAT<br>ACGAGAGAAACT   |
| GST-OTUD6B                                                          | CGCGGATCCATGGAGCCCC<br>GGGT           | ACGCGTCGACTTAGCTGCAAT<br>TTTCAGTAACT    |
| GST-pVHL                                                            | CGCGGATCCATGCCCGGAG<br>GGC            | ACGCGTCGACTCAATCTCCCA<br>TCCGTTGAT      |
| GST-elonginB                                                        | CGCGGATCCATGGACGTGT<br>TCCTCATGATCC   | ACGCGTCGACTCACTGCACGGC<br>TTGTTTCATTG   |
| <b>Target sequences of shRNA</b>                                    |                                       |                                         |
|                                                                     | #1                                    | #2                                      |
| shOTUB1                                                             | CACCACCAATCCGCACATC<br>TT             | TGTGGTTGTAAATGGTCCTAT                   |
| shOTUB2                                                             | CCGTTTACCTGCTCTATAA                   | CTTCTGCACTCACGAAGTA                     |

|          |                           |                           |
|----------|---------------------------|---------------------------|
| shOTUD2  | TGGTATGTCAGAAAGGATT       | AGCAGATGAAGCTAGAAGA       |
| shOTUD3  | TGGAAATCAGGGCTTAAAT       | GAGTTACACATCGCATATC       |
| shOTUD4  | ACGAAAAGACAAAGACTC<br>T   | AGGTTATCAGTACCATCGA       |
| shOTUD5  | AGATGCTAGAAGACAAGA<br>A   | ACCTAGACAGTATGAAGAA       |
| shOTUD6B | GGTATTGACCGAAGAGCTT<br>GA | GCTGAGAAGGCATCGCAAAG<br>A |
| shOTUD7B | GCAGCAGACACAGCAGAA<br>T   | TGGTATACACAGAAGATGA       |
| shOTULIN | ATCACCACGGACTCGCCGT<br>A  | ACCACGGACTCGCCGTATGG      |
| shHIF-1  | GTTACGTTCTTCGATCAG        | /                         |
| shHIF-2  | CGACCTGAAGATTGAAGTG<br>AT | /                         |
| shpVHL   | GGAAAATACACGTGGGGT<br>GG  | /                         |
| shNTC    | TTCTCCGAACGTGTCACGT       | /                         |

**Supplemental table 6. List of primary antibodies.**

| <b>Name</b>    | <b>Cat#</b> | <b>Company</b> | <b>Dilution rate</b>               |
|----------------|-------------|----------------|------------------------------------|
| OTUB1          | ab175200    | Abcame         | 1:1000 for WB                      |
| OTUB2          | GTX83953    | GeneTex        | 1:1000 for WB                      |
| OTUD2          | HPA028400   | Atlas          | 1:600 for WB                       |
| OTUD3          | HPA028544   | Atlas          | 1:500 for WB                       |
| OTUD4          | MA5-31812   | ThermoreFisher | 1:800 for WB                       |
| OTUD5          | HPA017375   | Atlas          | 1:600 for WB                       |
| OTUD6B         | NBP1-85652  | Novas          | 1:800 for WB and IF; 1:150 for IHC |
| OTUD7B         | 16605-1-AP  | Proteintech    | 1:2000 for WB                      |
| OTULIN         | 14127s      | CST            | 1:1000 for WB                      |
| E-Cadherin     | Ab1416      | Abcame         | 1:1000 for WB                      |
| Snail          | ab53519     | Abcame         | 1:1000 for WB                      |
| HIF-1 $\alpha$ | ab1         | Abcam          | 1:800 for WB; 1:50 for Chip        |
| HIF-2 $\alpha$ | ab199       | Abcam          | 1:800 for WB; 1:50 for Chip        |
| HIF-1 $\beta$  |             | Abcam          | 1:50 for Chip                      |
| pVHL           | NB100-485   | Novas          | 1:500 for WB; 1:150 for IHC        |
| pVHL           | sc-55506    | Santa Cruz     | 1:500 for IF                       |
| elonginB       | ab168836    | Abcam          | 1:1000 for WB                      |
| elonginB       | sc-133090   | Santa Cruz     | 1:500 for IF                       |
| elonginC       | ab226831    | Abcam          | 1:1000 for WB                      |
| Actin          | sc-1616     | Santa Cruz     | 1:1000 for WB                      |
| GAPDH          | sc-25778    | Santa Cruz     | 1:1000 for WB                      |
| Tubulin        | TA-10       | Zsbio          | 1:2500 for WB                      |
| HA             | M180-3      | MBL            | 1:2500 for WB                      |
| Myc            | sc-374171   | Santa Cruz     | 1:2500 for WB                      |
| Flag           | sc-965      | Santa Cruz     | 1:2500 for WB                      |
| His            | sc8036      | Santa Cruz     | 1:2500 for WB                      |

**Supplememntal table 7. List of real-time Q-PCR primers.**

| <b>Gene name</b> | <b>Forward Primer 5'-3'</b> | <b>Reverse Primer 5'-3'</b> |
|------------------|-----------------------------|-----------------------------|
| OTUD6B           | TGAGAAGGCATCGCAAAGAGA       | ATCTTCGGTGAGTTGCTTCCT       |
| OTUD6A           | ATGGATGATCCGAAGAGTGAACA     | GGTCTTGGGGACCGAGTTTT        |
| HIF-1 $\alpha$   | TTCCCGACTAGGCCCATTC         | CAGGTATTCAAGGTCCCATTTC      |
| HIF-2 $\alpha$   | CGGAGGTGTTCTATGAGCTGG       | AGCTTGTGTGTTCGCAGGAA        |
| VEGF             | GAGGAGCAGTTACGGTCTGTG       | TCCTTTCCTTAGCTGACACTTGT     |
| LOXL2            | GGGTGGAGGTGTACTATGATGG      | CTTGCCGTAGGAGGAGCTG         |
| MMP2             | TGACTTCTTGGATCGGGTCG        | AAGCACCATCAGATGACTG         |
| MMP14            | GGCTACAGCAATATGGCTACC       | GATGGCCGCTGAGAGTGAC         |
| DCN              | GACAAGGTCCGCCAGTTTATG       | TCGTCTAGTCTCCACTCATTCTG     |
| VCAN             | GTAACCCATGCGCTACATAAAGT     | GGCAAAGTAGGCATCGTTGAAA      |
| NOS2             | TGTGGAAGGACTACTTCAACCT      | GGGACTTGGCTCCTCAATCT        |
| pVHL             | GGGAACGGGGTGGGTTTAG         | GCTCGCGTGAGTTCACAGA         |
| VEGF-HRE         | ATCCGTCCTCAAGTTGCTTGT       | TCGATCTCAGGCTATCTCGTG       |
| OTUD6B-HRE       | AATCCAGCGTGCGCCCTTCTGTAA    | CTCAATCCTTCTTATATCTTGTTCC   |
| Actin            | CATCCTCACCCCTGAAGTACCC      | AGCCTGGATAGCAACGTACATG      |
| GAPDH            | TGCACCACCAACTGCTTAGC        | GGCATGGACTGTGGTCATGAG       |
